# Supplementary material for: Global mitigation efforts cannot neglect emerging emitters
Source: Research Square preprint supplement (doi:10.21203/rs.3.rs-376475/v2), 2022-04-18
Supplement: Supplementary file 1 [file 33a1055218dc5a34133f6d4e.xlsx]

## Sheet: Raw
Country	Year	Sector	Scenario	CO2/Mt
Algeria	2020	industry	1.5 degree	21.9946
Angola	2020	industry	1.5 degree	2.52244
Armenia	2020	industry	1.5 degree	0.16415
Azerbaijan	2020	industry	1.5 degree	4.66184
Bangladesh	2020	industry	1.5 degree	24.197
Benin	2020	industry	1.5 degree	0.605087
Bolivia (Plurinational State of)	2020	industry	1.5 degree	1.9532
Botswana	2020	industry	1.5 degree	1.17527
Cambodia	2020	industry	1.5 degree	0.967163
Cameroon	2020	industry	1.5 degree	0.827465
Chile	2020	industry	1.5 degree	8.20356
Colombia	2020	industry	1.5 degree	20.843
Cote d`Ivoire	2020	industry	1.5 degree	0.872785
Democratic Republic of the Congo	2020	industry	1.5 degree	0.293409
Egypt	2020	industry	1.5 degree	38.6398
Eritrea	2020	industry	1.5 degree	0.0911806
Ethiopia	2020	industry	1.5 degree	1.8008
Georgia	2020	industry	1.5 degree	0.317866
Ghana	2020	industry	1.5 degree	1.25766
Guatemala	2020	industry	1.5 degree	1.00791
Haiti	2020	industry	1.5 degree	0.542301
Honduras	2020	industry	1.5 degree	0.543513
Indonesia	2020	industry	1.5 degree	118.59
Iraq	2020	industry	1.5 degree	43.3388
Jordan	2020	industry	1.5 degree	6.64464
Kenya	2020	industry	1.5 degree	2.65705
Kyrgyzstan	2020	industry	1.5 degree	0.426742
Lao People`s Democratic Republic	2020	industry	1.5 degree	5.11265
Lebanon	2020	industry	1.5 degree	7.32662
Mali	2020	industry	1.5 degree	0.488899
Mongolia	2020	industry	1.5 degree	0.756577
Morocco	2020	industry	1.5 degree	9.44914
Mozambique	2020	industry	1.5 degree	0.830698
Myanmar	2020	industry	1.5 degree	8.79586
Namibia	2020	industry	1.5 degree	0.524165
Nepal	2020	industry	1.5 degree	4.21058
Nicaragua	2020	industry	1.5 degree	0.292723
Niger	2020	industry	1.5 degree	0.190976
Nigeria	2020	industry	1.5 degree	28.5762
Oman	2020	industry	1.5 degree	21.2815
Pakistan	2020	industry	1.5 degree	51.2007
Paraguay	2020	industry	1.5 degree	0.0043412
Peru	2020	industry	1.5 degree	5.8259
Philippines	2020	industry	1.5 degree	28.0234
Qatar	2020	industry	1.5 degree	24.2878
Republic of the Congo	2020	industry	1.5 degree	0.394174
Saudi Arabia	2020	industry	1.5 degree	55.2519
Senegal	2020	industry	1.5 degree	0.681085
South Sudan	2020	industry	1.5 degree	0.364406
Sri Lanka	2020	industry	1.5 degree	2.74275
Sudan	2020	industry	1.5 degree	2.2789
Tajikistan	2020	industry	1.5 degree	2.72181
Turkey	2020	industry	1.5 degree	92.1234
Turkmenistan	2020	industry	1.5 degree	22.3355
Uganda	2020	industry	1.5 degree	0.649915
United Arab Emirates	2020	industry	1.5 degree	54.9083
United Republic of Tanzania	2020	industry	1.5 degree	1.18936
Viet Nam	2020	industry	1.5 degree	62.2917
Zambia	2020	industry	1.5 degree	1.03497
Algeria	2021	industry	1.5 degree	20.0007
Angola	2021	industry	1.5 degree	2.37749
Armenia	2021	industry	1.5 degree	0.16415
Azerbaijan	2021	industry	1.5 degree	4.18909
Bangladesh	2021	industry	1.5 degree	23.8105
Benin	2021	industry	1.5 degree	0.590542
Bolivia (Plurinational State of)	2021	industry	1.5 degree	1.81293
Botswana	2021	industry	1.5 degree	1.10773
Cambodia	2021	industry	1.5 degree	0.964259
Cameroon	2021	industry	1.5 degree	0.779913
Chile	2021	industry	1.5 degree	8.15758
Colombia	2021	industry	1.5 degree	20.72
Cote d`Ivoire	2021	industry	1.5 degree	0.851804
Democratic Republic of the Congo	2021	industry	1.5 degree	0.276548
Egypt	2021	industry	1.5 degree	34.3055
Eritrea	2021	industry	1.5 degree	0.0908778
Ethiopia	2021	industry	1.5 degree	1.79482
Georgia	2021	industry	1.5 degree	0.317861
Ghana	2021	industry	1.5 degree	1.22743
Guatemala	2021	industry	1.5 degree	1.01085
Haiti	2021	industry	1.5 degree	0.513974
Honduras	2021	industry	1.5 degree	0.545095
Indonesia	2021	industry	1.5 degree	115.145
Iraq	2021	industry	1.5 degree	39.6617
Jordan	2021	industry	1.5 degree	6.08089
Kenya	2021	industry	1.5 degree	2.66509
Kyrgyzstan	2021	industry	1.5 degree	0.426827
Lao People`s Democratic Republic	2021	industry	1.5 degree	5.11159
Lebanon	2021	industry	1.5 degree	6.705
Mali	2021	industry	1.5 degree	0.477147
Mongolia	2021	industry	1.5 degree	0.756577
Morocco	2021	industry	1.5 degree	8.59253
Mozambique	2021	industry	1.5 degree	0.82794
Myanmar	2021	industry	1.5 degree	7.82878
Namibia	2021	industry	1.5 degree	0.494043
Nepal	2021	industry	1.5 degree	4.20909
Nicaragua	2021	industry	1.5 degree	0.293575
Niger	2021	industry	1.5 degree	0.186385
Nigeria	2021	industry	1.5 degree	25.3175
Oman	2021	industry	1.5 degree	19.4759
Pakistan	2021	industry	1.5 degree	50.5159
Paraguay	2021	industry	1.5 degree	0.0043412
Peru	2021	industry	1.5 degree	5.55078
Philippines	2021	industry	1.5 degree	27.9807
Qatar	2021	industry	1.5 degree	22.2271
Republic of the Congo	2021	industry	1.5 degree	0.371522
Saudi Arabia	2021	industry	1.5 degree	50.4113
Senegal	2021	industry	1.5 degree	0.664712
South Sudan	2021	industry	1.5 degree	0.363196
Sri Lanka	2021	industry	1.5 degree	2.47226
Sudan	2021	industry	1.5 degree	2.27134
Tajikistan	2021	industry	1.5 degree	2.46626
Turkey	2021	industry	1.5 degree	89.7466
Turkmenistan	2021	industry	1.5 degree	20.2384
Uganda	2021	industry	1.5 degree	0.647757
United Arab Emirates	2021	industry	1.5 degree	50.2496
United Republic of Tanzania	2021	industry	1.5 degree	1.13906
Viet Nam	2021	industry	1.5 degree	62.1576
Zambia	2021	industry	1.5 degree	1.03154
Algeria	2022	industry	1.5 degree	24.1109
Angola	2022	industry	1.5 degree	3.15487
Armenia	2022	industry	1.5 degree	0.172138
Azerbaijan	2022	industry	1.5 degree	3.94363
Bangladesh	2022	industry	1.5 degree	24.7581
Benin	2022	industry	1.5 degree	0.837619
Bolivia (Plurinational State of)	2022	industry	1.5 degree	1.69478
Botswana	2022	industry	1.5 degree	1.46993
Cambodia	2022	industry	1.5 degree	1.21748
Cameroon	2022	industry	1.5 degree	1.03493
Chile	2022	industry	1.5 degree	9.1205
Colombia	2022	industry	1.5 degree	24.7925
Cote d`Ivoire	2022	industry	1.5 degree	1.20819
Democratic Republic of the Congo	2022	industry	1.5 degree	0.366973
Egypt	2022	industry	1.5 degree	35.8853
Eritrea	2022	industry	1.5 degree	0.124642
Ethiopia	2022	industry	1.5 degree	2.46166
Georgia	2022	industry	1.5 degree	0.344881
Ghana	2022	industry	1.5 degree	1.74097
Guatemala	2022	industry	1.5 degree	1.14958
Haiti	2022	industry	1.5 degree	0.574766
Honduras	2022	industry	1.5 degree	0.619902
Indonesia	2022	industry	1.5 degree	120.853
Iraq	2022	industry	1.5 degree	40.7201
Jordan	2022	industry	1.5 degree	6.24316
Kenya	2022	industry	1.5 degree	3.61108
Kyrgyzstan	2022	industry	1.5 degree	0.49789
Lao People`s Democratic Republic	2022	industry	1.5 degree	5.4018
Lebanon	2022	industry	1.5 degree	6.88393
Mali	2022	industry	1.5 degree	0.67678
Mongolia	2022	industry	1.5 degree	0.898062
Morocco	2022	industry	1.5 degree	10.3583
Mozambique	2022	industry	1.5 degree	1.13555
Myanmar	2022	industry	1.5 degree	7.1603
Namibia	2022	industry	1.5 degree	0.655585
Nepal	2022	industry	1.5 degree	4.68757
Nicaragua	2022	industry	1.5 degree	0.333864
Niger	2022	industry	1.5 degree	0.264367
Nigeria	2022	industry	1.5 degree	29.4592
Oman	2022	industry	1.5 degree	19.9956
Pakistan	2022	industry	1.5 degree	53.6567
Paraguay	2022	industry	1.5 degree	0.004505
Peru	2022	industry	1.5 degree	5.95078
Philippines	2022	industry	1.5 degree	33.8565
Qatar	2022	industry	1.5 degree	22.8202
Republic of the Congo	2022	industry	1.5 degree	0.493002
Saudi Arabia	2022	industry	1.5 degree	56.4345
Senegal	2022	industry	1.5 degree	0.942822
South Sudan	2022	industry	1.5 degree	0.498136
Sri Lanka	2022	industry	1.5 degree	2.46302
Sudan	2022	industry	1.5 degree	3.11521
Tajikistan	2022	industry	1.5 degree	3.70607
Turkey	2022	industry	1.5 degree	108.877
Turkmenistan	2022	industry	1.5 degree	30.4124
Uganda	2022	industry	1.5 degree	0.88842
United Arab Emirates	2022	industry	1.5 degree	51.5906
United Republic of Tanzania	2022	industry	1.5 degree	1.31015
Viet Nam	2022	industry	1.5 degree	68.6203
Zambia	2022	industry	1.5 degree	1.41479
Algeria	2023	industry	1.5 degree	28.2167
Angola	2023	industry	1.5 degree	3.9052
Armenia	2023	industry	1.5 degree	0.179933
Azerbaijan	2023	industry	1.5 degree	3.69515
Bangladesh	2023	industry	1.5 degree	25.6804
Benin	2023	industry	1.5 degree	1.08114
Bolivia (Plurinational State of)	2023	industry	1.5 degree	1.57631
Botswana	2023	industry	1.5 degree	1.81953
Cambodia	2023	industry	1.5 degree	1.46869
Cameroon	2023	industry	1.5 degree	1.28106
Chile	2023	industry	1.5 degree	10.0751
Colombia	2023	industry	1.5 degree	28.8175
Cote d`Ivoire	2023	industry	1.5 degree	1.55944
Democratic Republic of the Congo	2023	industry	1.5 degree	0.45425
Egypt	2023	industry	1.5 degree	37.4302
Eritrea	2023	industry	1.5 degree	0.15779
Ethiopia	2023	industry	1.5 degree	3.11633
Georgia	2023	industry	1.5 degree	0.371508
Ghana	2023	industry	1.5 degree	2.24712
Guatemala	2023	industry	1.5 degree	1.28695
Haiti	2023	industry	1.5 degree	0.634823
Honduras	2023	industry	1.5 degree	0.693981
Indonesia	2023	industry	1.5 degree	126.407
Iraq	2023	industry	1.5 degree	41.7325
Jordan	2023	industry	1.5 degree	6.39837
Kenya	2023	industry	1.5 degree	4.53867
Kyrgyzstan	2023	industry	1.5 degree	0.568034
Lao People`s Democratic Republic	2023	industry	1.5 degree	5.68678
Lebanon	2023	industry	1.5 degree	7.05507
Mali	2023	industry	1.5 degree	0.873537
Mongolia	2023	industry	1.5 degree	1.03835
Morocco	2023	industry	1.5 degree	12.1222
Mozambique	2023	industry	1.5 degree	1.43754
Myanmar	2023	industry	1.5 degree	6.48818
Namibia	2023	industry	1.5 degree	0.811503
Nepal	2023	industry	1.5 degree	5.15681
Nicaragua	2023	industry	1.5 degree	0.373761
Niger	2023	industry	1.5 degree	0.341225
Nigeria	2023	industry	1.5 degree	33.5339
Oman	2023	industry	1.5 degree	20.4928
Pakistan	2023	industry	1.5 degree	56.7285
Paraguay	2023	industry	1.5 degree	0.00466604
Peru	2023	industry	1.5 degree	6.34541
Philippines	2023	industry	1.5 degree	39.6858
Qatar	2023	industry	1.5 degree	23.3876
Republic of the Congo	2023	industry	1.5 degree	0.610253
Saudi Arabia	2023	industry	1.5 degree	62.3836
Senegal	2023	industry	1.5 degree	1.21692
South Sudan	2023	industry	1.5 degree	0.630613
Sri Lanka	2023	industry	1.5 degree	2.45008
Sudan	2023	industry	1.5 degree	3.94369
Tajikistan	2023	industry	1.5 degree	4.93825
Turkey	2023	industry	1.5 degree	127.862
Turkmenistan	2023	industry	1.5 degree	40.5238
Uganda	2023	industry	1.5 degree	1.12469
United Arab Emirates	2023	industry	1.5 degree	52.8732
United Republic of Tanzania	2023	industry	1.5 degree	1.47635
Viet Nam	2023	industry	1.5 degree	74.9982
Zambia	2023	industry	1.5 degree	1.79104
Algeria	2024	industry	1.5 degree	32.2984
Angola	2024	industry	1.5 degree	4.6237
Armenia	2024	industry	1.5 degree	0.187509
Azerbaijan	2024	industry	1.5 degree	3.44333
Bangladesh	2024	industry	1.5 degree	26.5741
Benin	2024	industry	1.5 degree	1.32053
Bolivia (Plurinational State of)	2024	industry	1.5 degree	1.45748
Botswana	2024	industry	1.5 degree	2.15429
Cambodia	2024	industry	1.5 degree	1.7177
Cameroon	2024	industry	1.5 degree	1.51676
Chile	2024	industry	1.5 degree	11.0207
Colombia	2024	industry	1.5 degree	32.7826
Cote d`Ivoire	2024	industry	1.5 degree	1.90475
Democratic Republic of the Congo	2024	industry	1.5 degree	0.537826
Egypt	2024	industry	1.5 degree	38.9367
Eritrea	2024	industry	1.5 degree	0.190238
Ethiopia	2024	industry	1.5 degree	3.75717
Georgia	2024	industry	1.5 degree	0.397696
Ghana	2024	industry	1.5 degree	2.74469
Guatemala	2024	industry	1.5 degree	1.42282
Haiti	2024	industry	1.5 degree	0.694059
Honduras	2024	industry	1.5 degree	0.767249
Indonesia	2024	industry	1.5 degree	131.785
Iraq	2024	industry	1.5 degree	42.6931
Jordan	2024	industry	1.5 degree	6.54565
Kenya	2024	industry	1.5 degree	5.4453
Kyrgyzstan	2024	industry	1.5 degree	0.637161
Lao People`s Democratic Republic	2024	industry	1.5 degree	5.9658
Lebanon	2024	industry	1.5 degree	7.21747
Mali	2024	industry	1.5 degree	1.06696
Mongolia	2024	industry	1.5 degree	1.17731
Morocco	2024	industry	1.5 degree	13.8758
Mozambique	2024	industry	1.5 degree	1.73316
Myanmar	2024	industry	1.5 degree	5.81202
Namibia	2024	industry	1.5 degree	0.960808
Nepal	2024	industry	1.5 degree	5.61561
Nicaragua	2024	industry	1.5 degree	0.413222
Niger	2024	industry	1.5 degree	0.416782
Nigeria	2024	industry	1.5 degree	37.5354
Oman	2024	industry	1.5 degree	20.9645
Pakistan	2024	industry	1.5 degree	59.7221
Paraguay	2024	industry	1.5 degree	0.00482401
Peru	2024	industry	1.5 degree	6.73282
Philippines	2024	industry	1.5 degree	45.4602
Qatar	2024	industry	1.5 degree	23.9259
Republic of the Congo	2024	industry	1.5 degree	0.722531
Saudi Arabia	2024	industry	1.5 degree	68.2517
Senegal	2024	industry	1.5 degree	1.48639
South Sudan	2024	industry	1.5 degree	0.760292
Sri Lanka	2024	industry	1.5 degree	2.43301
Sudan	2024	industry	1.5 degree	4.75467
Tajikistan	2024	industry	1.5 degree	6.16223
Turkey	2024	industry	1.5 degree	146.716
Turkmenistan	2024	industry	1.5 degree	50.5679
Uganda	2024	industry	1.5 degree	1.35597
United Arab Emirates	2024	industry	1.5 degree	54.0903
United Republic of Tanzania	2024	industry	1.5 degree	1.63696
Viet Nam	2024	industry	1.5 degree	81.2766
Zambia	2024	industry	1.5 degree	2.15935
Algeria	2025	industry	1.5 degree	36.3473
Angola	2025	industry	1.5 degree	5.30493
Armenia	2025	industry	1.5 degree	0.194834
Azerbaijan	2025	industry	1.5 degree	3.1878
Bangladesh	2025	industry	1.5 degree	27.4354
Benin	2025	industry	1.5 degree	1.55527
Bolivia (Plurinational State of)	2025	industry	1.5 degree	1.33826
Botswana	2025	industry	1.5 degree	2.4717
Cambodia	2025	industry	1.5 degree	1.96434
Cameroon	2025	industry	1.5 degree	1.74023
Chile	2025	industry	1.5 degree	11.9567
Colombia	2025	industry	1.5 degree	36.6779
Cote d`Ivoire	2025	industry	1.5 degree	2.24334
Democratic Republic of the Congo	2025	industry	1.5 degree	0.617066
Egypt	2025	industry	1.5 degree	40.4012
Eritrea	2025	industry	1.5 degree	0.221893
Ethiopia	2025	industry	1.5 degree	4.38235
Georgia	2025	industry	1.5 degree	0.423393
Ghana	2025	industry	1.5 degree	3.23259
Guatemala	2025	industry	1.5 degree	1.55703
Haiti	2025	industry	1.5 degree	0.752393
Honduras	2025	industry	1.5 degree	0.839619
Indonesia	2025	industry	1.5 degree	136.962
Iraq	2025	industry	1.5 degree	43.5965
Jordan	2025	industry	1.5 degree	6.68416
Kenya	2025	industry	1.5 degree	6.32813
Kyrgyzstan	2025	industry	1.5 degree	0.705162
Lao People`s Democratic Republic	2025	industry	1.5 degree	6.23799
Lebanon	2025	industry	1.5 degree	7.3702
Mali	2025	industry	1.5 degree	1.25663
Mongolia	2025	industry	1.5 degree	1.31482
Morocco	2025	industry	1.5 degree	15.6152
Mozambique	2025	industry	1.5 degree	2.02155
Myanmar	2025	industry	1.5 degree	5.13139
Namibia	2025	industry	1.5 degree	1.10237
Nepal	2025	industry	1.5 degree	6.06261
Nicaragua	2025	industry	1.5 degree	0.452198
Niger	2025	industry	1.5 degree	0.49087
Nigeria	2025	industry	1.5 degree	41.457
Oman	2025	industry	1.5 degree	21.4081
Pakistan	2025	industry	1.5 degree	62.6276
Paraguay	2025	industry	1.5 degree	0.00497851
Peru	2025	industry	1.5 degree	7.11166
Philippines	2025	industry	1.5 degree	51.1717
Qatar	2025	industry	1.5 degree	24.4322
Republic of the Congo	2025	industry	1.5 degree	0.828985
Saudi Arabia	2025	industry	1.5 degree	74.032
Senegal	2025	industry	1.5 degree	1.75061
South Sudan	2025	industry	1.5 degree	0.886803
Sri Lanka	2025	industry	1.5 degree	2.41134
Sudan	2025	industry	1.5 degree	5.54584
Tajikistan	2025	industry	1.5 degree	7.37742
Turkey	2025	industry	1.5 degree	165.509
Turkmenistan	2025	industry	1.5 degree	60.5399
Uganda	2025	industry	1.5 degree	1.58161
United Arab Emirates	2025	industry	1.5 degree	55.2348
United Republic of Tanzania	2025	industry	1.5 degree	1.79121
Viet Nam	2025	industry	1.5 degree	87.4416
Zambia	2025	industry	1.5 degree	2.51866
Algeria	2026	industry	1.5 degree	35.3356
Angola	2026	industry	1.5 degree	6.07022
Armenia	2026	industry	1.5 degree	0.19705
Azerbaijan	2026	industry	1.5 degree	3.17083
Bangladesh	2026	industry	1.5 degree	27.5071
Benin	2026	industry	1.5 degree	1.63163
Bolivia (Plurinational State of)	2026	industry	1.5 degree	1.33239
Botswana	2026	industry	1.5 degree	2.82826
Cambodia	2026	industry	1.5 degree	2.09963
Cameroon	2026	industry	1.5 degree	1.99128
Chile	2026	industry	1.5 degree	12.0759
Colombia	2026	industry	1.5 degree	38.4845
Cote d`Ivoire	2026	industry	1.5 degree	2.35348
Democratic Republic of the Congo	2026	industry	1.5 degree	0.706085
Egypt	2026	industry	1.5 degree	40.0939
Eritrea	2026	industry	1.5 degree	0.238601
Ethiopia	2026	industry	1.5 degree	4.71233
Georgia	2026	industry	1.5 degree	0.41673
Ghana	2026	industry	1.5 degree	3.3913
Guatemala	2026	industry	1.5 degree	1.59462
Haiti	2026	industry	1.5 degree	0.766734
Honduras	2026	industry	1.5 degree	0.859891
Indonesia	2026	industry	1.5 degree	139.25
Iraq	2026	industry	1.5 degree	44.4531
Jordan	2026	industry	1.5 degree	6.81549
Kenya	2026	industry	1.5 degree	6.87775
Kyrgyzstan	2026	industry	1.5 degree	0.726968
Lao People`s Democratic Republic	2026	industry	1.5 degree	6.47721
Lebanon	2026	industry	1.5 degree	7.515
Mali	2026	industry	1.5 degree	1.31832
Mongolia	2026	industry	1.5 degree	1.37629
Morocco	2026	industry	1.5 degree	15.1806
Mozambique	2026	industry	1.5 degree	2.17377
Myanmar	2026	industry	1.5 degree	4.9728
Namibia	2026	industry	1.5 degree	1.2614
Nepal	2026	industry	1.5 degree	6.22909
Nicaragua	2026	industry	1.5 degree	0.463116
Niger	2026	industry	1.5 degree	0.51497
Nigeria	2026	industry	1.5 degree	41.5718
Oman	2026	industry	1.5 degree	21.8287
Pakistan	2026	industry	1.5 degree	63.763
Paraguay	2026	industry	1.5 degree	0.00509097
Peru	2026	industry	1.5 degree	7.23634
Philippines	2026	industry	1.5 degree	52.7655
Qatar	2026	industry	1.5 degree	24.9122
Republic of the Congo	2026	industry	1.5 degree	0.948575
Saudi Arabia	2026	industry	1.5 degree	73.5866
Senegal	2026	industry	1.5 degree	1.83656
South Sudan	2026	industry	1.5 degree	0.953576
Sri Lanka	2026	industry	1.5 degree	2.5307
Sudan	2026	industry	1.5 degree	5.96342
Tajikistan	2026	industry	1.5 degree	7.34541
Turkey	2026	industry	1.5 degree	164.81
Turkmenistan	2026	industry	1.5 degree	60.2772
Uganda	2026	industry	1.5 degree	1.70069
United Arab Emirates	2026	industry	1.5 degree	56.32
United Republic of Tanzania	2026	industry	1.5 degree	1.93861
Viet Nam	2026	industry	1.5 degree	90.8018
Zambia	2026	industry	1.5 degree	2.70831
Algeria	2027	industry	1.5 degree	34.2807
Angola	2027	industry	1.5 degree	6.78453
Armenia	2027	industry	1.5 degree	0.198936
Azerbaijan	2027	industry	1.5 degree	3.14929
Bangladesh	2027	industry	1.5 degree	27.5375
Benin	2027	industry	1.5 degree	1.70214
Bolivia (Plurinational State of)	2027	industry	1.5 degree	1.32603
Botswana	2027	industry	1.5 degree	3.16108
Cambodia	2027	industry	1.5 degree	2.23212
Cameroon	2027	industry	1.5 degree	2.22561
Chile	2027	industry	1.5 degree	12.1835
Colombia	2027	industry	1.5 degree	40.1998
Cote d`Ivoire	2027	industry	1.5 degree	2.45519
Democratic Republic of the Congo	2027	industry	1.5 degree	0.789173
Egypt	2027	industry	1.5 degree	39.7366
Eritrea	2027	industry	1.5 degree	0.254297
Ethiopia	2027	industry	1.5 degree	5.02233
Georgia	2027	industry	1.5 degree	0.409452
Ghana	2027	industry	1.5 degree	3.53787
Guatemala	2027	industry	1.5 degree	1.63017
Haiti	2027	industry	1.5 degree	0.779992
Honduras	2027	industry	1.5 degree	0.879063
Indonesia	2027	industry	1.5 degree	141.277
Iraq	2027	industry	1.5 degree	45.2398
Jordan	2027	industry	1.5 degree	6.93611
Kenya	2027	industry	1.5 degree	7.39682
Kyrgyzstan	2027	industry	1.5 degree	0.747392
Lao People`s Democratic Republic	2027	industry	1.5 degree	6.70746
Lebanon	2027	industry	1.5 degree	7.64801
Mali	2027	industry	1.5 degree	1.3753
Mongolia	2027	industry	1.5 degree	1.43599
Morocco	2027	industry	1.5 degree	14.7274
Mozambique	2027	industry	1.5 degree	2.31677
Myanmar	2027	industry	1.5 degree	4.80873
Namibia	2027	industry	1.5 degree	1.40983
Nepal	2027	industry	1.5 degree	6.38053
Nicaragua	2027	industry	1.5 degree	0.473442
Niger	2027	industry	1.5 degree	0.537225
Nigeria	2027	industry	1.5 degree	41.5914
Oman	2027	industry	1.5 degree	22.215
Pakistan	2027	industry	1.5 degree	64.7865
Paraguay	2027	industry	1.5 degree	0.00519908
Peru	2027	industry	1.5 degree	7.34975
Philippines	2027	industry	1.5 degree	54.2782
Qatar	2027	industry	1.5 degree	25.3532
Republic of the Congo	2027	industry	1.5 degree	1.0602
Saudi Arabia	2027	industry	1.5 degree	73.0376
Senegal	2027	industry	1.5 degree	1.91593
South Sudan	2027	industry	1.5 degree	1.01631
Sri Lanka	2027	industry	1.5 degree	2.64437
Sudan	2027	industry	1.5 degree	6.35572
Tajikistan	2027	industry	1.5 degree	7.30326
Turkey	2027	industry	1.5 degree	163.95
Turkmenistan	2027	industry	1.5 degree	59.9314
Uganda	2027	industry	1.5 degree	1.81257
United Arab Emirates	2027	industry	1.5 degree	57.3168
United Republic of Tanzania	2027	industry	1.5 degree	2.07775
Viet Nam	2027	industry	1.5 degree	94.0174
Zambia	2027	industry	1.5 degree	2.88648
Algeria	2028	industry	1.5 degree	33.1794
Angola	2028	industry	1.5 degree	7.43874
Armenia	2028	industry	1.5 degree	0.200443
Azerbaijan	2028	industry	1.5 degree	3.12269
Bangladesh	2028	industry	1.5 degree	27.5213
Benin	2028	industry	1.5 degree	1.76614
Bolivia (Plurinational State of)	2028	industry	1.5 degree	1.31911
Botswana	2028	industry	1.5 degree	3.46589
Cambodia	2028	industry	1.5 degree	2.36157
Cameroon	2028	industry	1.5 degree	2.44021
Chile	2028	industry	1.5 degree	12.2783
Colombia	2028	industry	1.5 degree	41.8119
Cote d`Ivoire	2028	industry	1.5 degree	2.5475
Democratic Republic of the Congo	2028	industry	1.5 degree	0.86527
Egypt	2028	industry	1.5 degree	39.3247
Eritrea	2028	industry	1.5 degree	0.268853
Ethiopia	2028	industry	1.5 degree	5.30979
Georgia	2028	industry	1.5 degree	0.401487
Ghana	2028	industry	1.5 degree	3.67088
Guatemala	2028	industry	1.5 degree	1.66347
Haiti	2028	industry	1.5 degree	0.792068
Honduras	2028	industry	1.5 degree	0.897017
Indonesia	2028	industry	1.5 degree	143.005
Iraq	2028	industry	1.5 degree	45.9498
Jordan	2028	industry	1.5 degree	7.04497
Kenya	2028	industry	1.5 degree	7.8813
Kyrgyzstan	2028	industry	1.5 degree	0.766282
Lao People`s Democratic Republic	2028	industry	1.5 degree	6.92743
Lebanon	2028	industry	1.5 degree	7.76804
Mali	2028	industry	1.5 degree	1.427
Mongolia	2028	industry	1.5 degree	1.49373
Morocco	2028	industry	1.5 degree	14.2543
Mozambique	2028	industry	1.5 degree	2.44937
Myanmar	2028	industry	1.5 degree	4.63861
Namibia	2028	industry	1.5 degree	1.54578
Nepal	2028	industry	1.5 degree	6.51497
Nicaragua	2028	industry	1.5 degree	0.483112
Niger	2028	industry	1.5 degree	0.557423
Nigeria	2028	industry	1.5 degree	41.507
Oman	2028	industry	1.5 degree	22.5637
Pakistan	2028	industry	1.5 degree	65.6838
Paraguay	2028	industry	1.5 degree	0.00530231
Peru	2028	industry	1.5 degree	7.45057
Philippines	2028	industry	1.5 degree	55.6994
Qatar	2028	industry	1.5 degree	25.7511
Republic of the Congo	2028	industry	1.5 degree	1.16243
Saudi Arabia	2028	industry	1.5 degree	72.3767
Senegal	2028	industry	1.5 degree	1.98796
South Sudan	2028	industry	1.5 degree	1.07448
Sri Lanka	2028	industry	1.5 degree	2.75171
Sudan	2028	industry	1.5 degree	6.71951
Tajikistan	2028	industry	1.5 degree	7.25025
Turkey	2028	industry	1.5 degree	162.91
Turkmenistan	2028	industry	1.5 degree	59.4963
Uganda	2028	industry	1.5 degree	1.91632
United Arab Emirates	2028	industry	1.5 degree	58.2164
United Republic of Tanzania	2028	industry	1.5 degree	2.20748
Viet Nam	2028	industry	1.5 degree	97.07
Zambia	2028	industry	1.5 degree	3.05169
Algeria	2029	industry	1.5 degree	32.0283
Angola	2029	industry	1.5 degree	8.02224
Armenia	2029	industry	1.5 degree	0.201516
Azerbaijan	2029	industry	1.5 degree	3.09047
Bangladesh	2029	industry	1.5 degree	27.4525
Benin	2029	industry	1.5 degree	1.82285
Bolivia (Plurinational State of)	2029	industry	1.5 degree	1.31159
Botswana	2029	industry	1.5 degree	3.73776
Cambodia	2029	industry	1.5 degree	2.48773
Cameroon	2029	industry	1.5 degree	2.63163
Chile	2029	industry	1.5 degree	12.359
Colombia	2029	industry	1.5 degree	43.3071
Cote d`Ivoire	2029	industry	1.5 degree	2.62931
Democratic Republic of the Congo	2029	industry	1.5 degree	0.933143
Egypt	2029	industry	1.5 degree	38.8532
Eritrea	2029	industry	1.5 degree	0.282121
Ethiopia	2029	industry	1.5 degree	5.57184
Georgia	2029	industry	1.5 degree	0.392751
Ghana	2029	industry	1.5 degree	3.78876
Guatemala	2029	industry	1.5 degree	1.69427
Haiti	2029	industry	1.5 degree	0.802856
Honduras	2029	industry	1.5 degree	0.913625
Indonesia	2029	industry	1.5 degree	144.391
Iraq	2029	industry	1.5 degree	46.5753
Jordan	2029	industry	1.5 degree	7.14087
Kenya	2029	industry	1.5 degree	8.32663
Kyrgyzstan	2029	industry	1.5 degree	0.783476
Lao People`s Democratic Republic	2029	industry	1.5 degree	7.13558
Lebanon	2029	industry	1.5 degree	7.87378
Mali	2029	industry	1.5 degree	1.47283
Mongolia	2029	industry	1.5 degree	1.5493
Morocco	2029	industry	1.5 degree	13.7597
Mozambique	2029	industry	1.5 degree	2.57025
Myanmar	2029	industry	1.5 degree	4.46178
Namibia	2029	industry	1.5 degree	1.66703
Nepal	2029	industry	1.5 degree	6.63022
Nicaragua	2029	industry	1.5 degree	0.492056
Niger	2029	industry	1.5 degree	0.575324
Nigeria	2029	industry	1.5 degree	41.3092
Oman	2029	industry	1.5 degree	22.8708
Pakistan	2029	industry	1.5 degree	66.4391
Paraguay	2029	industry	1.5 degree	0.00540008
Peru	2029	industry	1.5 degree	7.53729
Philippines	2029	industry	1.5 degree	57.0163
Qatar	2029	industry	1.5 degree	26.1016
Republic of the Congo	2029	industry	1.5 degree	1.25361
Saudi Arabia	2029	industry	1.5 degree	71.5947
Senegal	2029	industry	1.5 degree	2.0518
South Sudan	2029	industry	1.5 degree	1.1275
Sri Lanka	2029	industry	1.5 degree	2.85201
Sudan	2029	industry	1.5 degree	7.05112
Tajikistan	2029	industry	1.5 degree	7.18556
Turkey	2029	industry	1.5 degree	161.668
Turkmenistan	2029	industry	1.5 degree	58.9655
Uganda	2029	industry	1.5 degree	2.01089
United Arab Emirates	2029	industry	1.5 degree	59.0089
United Republic of Tanzania	2029	industry	1.5 degree	2.32649
Viet Nam	2029	industry	1.5 degree	99.9391
Zambia	2029	industry	1.5 degree	3.20229
Algeria	2030	industry	1.5 degree	30.8235
Angola	2030	industry	1.5 degree	8.52266
Armenia	2030	industry	1.5 degree	0.202092
Azerbaijan	2030	industry	1.5 degree	3.05202
Bangladesh	2030	industry	1.5 degree	27.3243
Benin	2030	industry	1.5 degree	1.87145
Bolivia (Plurinational State of)	2030	industry	1.5 degree	1.30338
Botswana	2030	industry	1.5 degree	3.97092
Cambodia	2030	industry	1.5 degree	2.61031
Cameroon	2030	industry	1.5 degree	2.79578
Chile	2030	industry	1.5 degree	12.4242
Colombia	2030	industry	1.5 degree	44.6699
Cote d`Ivoire	2030	industry	1.5 degree	2.69941
Democratic Republic of the Congo	2030	industry	1.5 degree	0.991351
Egypt	2030	industry	1.5 degree	38.3166
Eritrea	2030	industry	1.5 degree	0.293936
Ethiopia	2030	industry	1.5 degree	5.80519
Georgia	2030	industry	1.5 degree	0.383151
Ghana	2030	industry	1.5 degree	3.88977
Guatemala	2030	industry	1.5 degree	1.7223
Haiti	2030	industry	1.5 degree	0.812239
Honduras	2030	industry	1.5 degree	0.92874
Indonesia	2030	industry	1.5 degree	145.387
Iraq	2030	industry	1.5 degree	47.1078
Jordan	2030	industry	1.5 degree	7.22251
Kenya	2030	industry	1.5 degree	8.72766
Kyrgyzstan	2030	industry	1.5 degree	0.798791
Lao People`s Democratic Republic	2030	industry	1.5 degree	7.33015
Lebanon	2030	industry	1.5 degree	7.96379
Mali	2030	industry	1.5 degree	1.5121
Mongolia	2030	industry	1.5 degree	1.60249
Morocco	2030	industry	1.5 degree	13.2421
Mozambique	2030	industry	1.5 degree	2.6779
Myanmar	2030	industry	1.5 degree	4.48101
Namibia	2030	industry	1.5 degree	1.77102
Nepal	2030	industry	1.5 degree	6.72378
Nicaragua	2030	industry	1.5 degree	0.500197
Niger	2030	industry	1.5 degree	0.590663
Nigeria	2030	industry	1.5 degree	40.9875
Oman	2030	industry	1.5 degree	23.1323
Pakistan	2030	industry	1.5 degree	67.0344
Paraguay	2030	industry	1.5 degree	0.00549172
Peru	2030	industry	1.5 degree	7.60821
Philippines	2030	industry	1.5 degree	58.2145
Qatar	2030	industry	1.5 degree	26.4
Republic of the Congo	2030	industry	1.5 degree	1.33181
Saudi Arabia	2030	industry	1.5 degree	70.6814
Senegal	2030	industry	1.5 degree	2.1065
South Sudan	2030	industry	1.5 degree	1.17473
Sri Lanka	2030	industry	1.5 degree	2.94446
Sudan	2030	industry	1.5 degree	7.34643
Tajikistan	2030	industry	1.5 degree	7.10834
Turkey	2030	industry	1.5 degree	160.2
Turkmenistan	2030	industry	1.5 degree	58.3318
Uganda	2030	industry	1.5 degree	2.09511
United Arab Emirates	2030	industry	1.5 degree	59.6834
United Republic of Tanzania	2030	industry	1.5 degree	2.43328
Viet Nam	2030	industry	1.5 degree	102.601
Zambia	2030	industry	1.5 degree	3.33641
Algeria	2031	industry	1.5 degree	29.901
Angola	2031	industry	1.5 degree	9.90946
Armenia	2031	industry	1.5 degree	0.215004
Azerbaijan	2031	industry	1.5 degree	3.14254
Bangladesh	2031	industry	1.5 degree	27.8106
Benin	2031	industry	1.5 degree	1.97442
Bolivia (Plurinational State of)	2031	industry	1.5 degree	1.25561
Botswana	2031	industry	1.5 degree	4.61706
Cambodia	2031	industry	1.5 degree	2.6544
Cameroon	2031	industry	1.5 degree	3.25071
Chile	2031	industry	1.5 degree	12.1598
Colombia	2031	industry	1.5 degree	45.5127
Cote d`Ivoire	2031	industry	1.5 degree	2.84792
Democratic Republic of the Congo	2031	industry	1.5 degree	1.15266
Egypt	2031	industry	1.5 degree	38.1157
Eritrea	2031	industry	1.5 degree	0.31635
Ethiopia	2031	industry	1.5 degree	6.24785
Georgia	2031	industry	1.5 degree	0.392413
Ghana	2031	industry	1.5 degree	4.10378
Guatemala	2031	industry	1.5 degree	1.65415
Haiti	2031	industry	1.5 degree	0.787298
Honduras	2031	industry	1.5 degree	0.891993
Indonesia	2031	industry	1.5 degree	158.067
Iraq	2031	industry	1.5 degree	47.1208
Jordan	2031	industry	1.5 degree	7.2245
Kenya	2031	industry	1.5 degree	9.44007
Kyrgyzstan	2031	industry	1.5 degree	0.799972
Lao People`s Democratic Republic	2031	industry	1.5 degree	7.42272
Lebanon	2031	industry	1.5 degree	7.96599
Mali	2031	industry	1.5 degree	1.59529
Mongolia	2031	industry	1.5 degree	1.62821
Morocco	2031	industry	1.5 degree	12.8458
Mozambique	2031	industry	1.5 degree	2.88209
Myanmar	2031	industry	1.5 degree	4.15681
Namibia	2031	industry	1.5 degree	2.05919
Nepal	2031	industry	1.5 degree	7.06103
Nicaragua	2031	industry	1.5 degree	0.480406
Niger	2031	industry	1.5 degree	0.62316
Nigeria	2031	industry	1.5 degree	42.2582
Oman	2031	industry	1.5 degree	23.1387
Pakistan	2031	industry	1.5 degree	69.3012
Paraguay	2031	industry	1.5 degree	0.00514714
Peru	2031	industry	1.5 degree	7.4733
Philippines	2031	industry	1.5 degree	59.5938
Qatar	2031	industry	1.5 degree	26.4073
Republic of the Congo	2031	industry	1.5 degree	1.54852
Saudi Arabia	2031	industry	1.5 degree	67.946
Senegal	2031	industry	1.5 degree	2.2224
South Sudan	2031	industry	1.5 degree	1.2643
Sri Lanka	2031	industry	1.5 degree	3.10293
Sudan	2031	industry	1.5 degree	7.90662
Tajikistan	2031	industry	1.5 degree	6.95695
Turkey	2031	industry	1.5 degree	153.025
Turkmenistan	2031	industry	1.5 degree	57.0895
Uganda	2031	industry	1.5 degree	2.25487
United Arab Emirates	2031	industry	1.5 degree	59.6999
United Republic of Tanzania	2031	industry	1.5 degree	2.65034
Viet Nam	2031	industry	1.5 degree	103.633
Zambia	2031	industry	1.5 degree	3.59082
Algeria	2032	industry	1.5 degree	28.9127
Angola	2032	industry	1.5 degree	11.1816
Armenia	2032	industry	1.5 degree	0.227262
Azerbaijan	2032	industry	1.5 degree	3.2254
Bangladesh	2032	industry	1.5 degree	28.2212
Benin	2032	industry	1.5 degree	2.06726
Bolivia (Plurinational State of)	2032	industry	1.5 degree	1.207
Botswana	2032	industry	1.5 degree	5.20979
Cambodia	2032	industry	1.5 degree	2.69428
Cameroon	2032	industry	1.5 degree	3.66804
Chile	2032	industry	1.5 degree	11.8769
Colombia	2032	industry	1.5 degree	46.1842
Cote d`Ivoire	2032	industry	1.5 degree	2.98185
Democratic Republic of the Congo	2032	industry	1.5 degree	1.30064
Egypt	2032	industry	1.5 degree	37.8369
Eritrea	2032	industry	1.5 degree	0.336914
Ethiopia	2032	industry	1.5 degree	6.654
Georgia	2032	industry	1.5 degree	0.400591
Ghana	2032	industry	1.5 degree	4.29676
Guatemala	2032	industry	1.5 degree	1.58258
Haiti	2032	industry	1.5 degree	0.760678
Honduras	2032	industry	1.5 degree	0.853396
Indonesia	2032	industry	1.5 degree	170.232
Iraq	2032	industry	1.5 degree	47.0211
Jordan	2032	industry	1.5 degree	7.20921
Kenya	2032	industry	1.5 degree	10.0958
Kyrgyzstan	2032	industry	1.5 degree	0.798848
Lao People`s Democratic Republic	2032	industry	1.5 degree	7.4973
Lebanon	2032	industry	1.5 degree	7.94913
Mali	2032	industry	1.5 degree	1.67031
Mongolia	2032	industry	1.5 degree	1.65099
Morocco	2032	industry	1.5 degree	12.4212
Mozambique	2032	industry	1.5 degree	3.06945
Myanmar	2032	industry	1.5 degree	4.02699
Namibia	2032	industry	1.5 degree	2.32355
Nepal	2032	industry	1.5 degree	7.37061
Nicaragua	2032	industry	1.5 degree	0.459619
Niger	2032	industry	1.5 degree	0.652464
Nigeria	2032	industry	1.5 degree	43.3812
Oman	2032	industry	1.5 degree	23.0897
Pakistan	2032	industry	1.5 degree	71.365
Paraguay	2032	industry	1.5 degree	0.00479485
Peru	2032	industry	1.5 degree	7.31822
Philippines	2032	industry	1.5 degree	60.8172
Qatar	2032	industry	1.5 degree	26.3514
Republic of the Congo	2032	industry	1.5 degree	1.74732
Saudi Arabia	2032	industry	1.5 degree	65.0569
Senegal	2032	industry	1.5 degree	2.32691
South Sudan	2032	industry	1.5 degree	1.34649
Sri Lanka	2032	industry	1.5 degree	3.25168
Sudan	2032	industry	1.5 degree	8.4206
Tajikistan	2032	industry	1.5 degree	6.7911
Turkey	2032	industry	1.5 degree	145.577
Turkmenistan	2032	industry	1.5 degree	55.7285
Uganda	2032	industry	1.5 degree	2.40145
United Arab Emirates	2032	industry	1.5 degree	59.5736
United Republic of Tanzania	2032	industry	1.5 degree	2.85153
Viet Nam	2032	industry	1.5 degree	104.399
Zambia	2032	industry	1.5 degree	3.82425
Algeria	2033	industry	1.5 degree	27.8537
Angola	2033	industry	1.5 degree	12.3187
Armenia	2033	industry	1.5 degree	0.238772
Azerbaijan	2033	industry	1.5 degree	3.29976
Bangladesh	2033	industry	1.5 degree	28.5463
Benin	2033	industry	1.5 degree	2.14882
Bolivia (Plurinational State of)	2033	industry	1.5 degree	1.15744
Botswana	2033	industry	1.5 degree	5.73961
Cambodia	2033	industry	1.5 degree	2.7296
Cameroon	2033	industry	1.5 degree	4.04106
Chile	2033	industry	1.5 degree	11.5733
Colombia	2033	industry	1.5 degree	46.6611
Cote d`Ivoire	2033	industry	1.5 degree	3.09948
Democratic Republic of the Congo	2033	industry	1.5 degree	1.43291
Egypt	2033	industry	1.5 degree	37.4728
Eritrea	2033	industry	1.5 degree	0.355393
Ethiopia	2033	industry	1.5 degree	7.01894
Georgia	2033	industry	1.5 degree	0.407553
Ghana	2033	industry	1.5 degree	4.46628
Guatemala	2033	industry	1.5 degree	1.50719
Haiti	2033	industry	1.5 degree	0.732227
Honduras	2033	industry	1.5 degree	0.812746
Indonesia	2033	industry	1.5 degree	181.802
Iraq	2033	industry	1.5 degree	46.7971
Jordan	2033	industry	1.5 degree	7.17487
Kenya	2033	industry	1.5 degree	10.6872
Kyrgyzstan	2033	industry	1.5 degree	0.795171
Lao People`s Democratic Republic	2033	industry	1.5 degree	7.55116
Lebanon	2033	industry	1.5 degree	7.91127
Mali	2033	industry	1.5 degree	1.73621
Mongolia	2033	industry	1.5 degree	1.67049
Morocco	2033	industry	1.5 degree	11.9663
Mozambique	2033	industry	1.5 degree	3.23779
Myanmar	2033	industry	1.5 degree	3.88709
Namibia	2033	industry	1.5 degree	2.55985
Nepal	2033	industry	1.5 degree	7.64896
Nicaragua	2033	industry	1.5 degree	0.437725
Niger	2033	industry	1.5 degree	0.678205
Nigeria	2033	industry	1.5 degree	44.3431
Oman	2033	industry	1.5 degree	22.9797
Pakistan	2033	industry	1.5 degree	73.2
Paraguay	2033	industry	1.5 degree	0.00443391
Peru	2033	industry	1.5 degree	7.14046
Philippines	2033	industry	1.5 degree	61.8609
Qatar	2033	industry	1.5 degree	26.2259
Republic of the Congo	2033	industry	1.5 degree	1.92501
Saudi Arabia	2033	industry	1.5 degree	62.0013
Senegal	2033	industry	1.5 degree	2.41871
South Sudan	2033	industry	1.5 degree	1.42034
Sri Lanka	2033	industry	1.5 degree	3.38962
Sudan	2033	industry	1.5 degree	8.88243
Tajikistan	2033	industry	1.5 degree	6.60973
Turkey	2033	industry	1.5 degree	137.808
Turkmenistan	2033	industry	1.5 degree	54.2401
Uganda	2033	industry	1.5 degree	2.53316
United Arab Emirates	2033	industry	1.5 degree	59.2898
United Republic of Tanzania	2033	industry	1.5 degree	3.0346
Viet Nam	2033	industry	1.5 degree	104.867
Zambia	2033	industry	1.5 degree	4.03399
Algeria	2034	industry	1.5 degree	26.7183
Angola	2034	industry	1.5 degree	13.2969
Armenia	2034	industry	1.5 degree	0.249422
Azerbaijan	2034	industry	1.5 degree	3.36471
Bangladesh	2034	industry	1.5 degree	28.7749
Benin	2034	industry	1.5 degree	2.21777
Bolivia (Plurinational State of)	2034	industry	1.5 degree	1.10683
Botswana	2034	industry	1.5 degree	6.19533
Cambodia	2034	industry	1.5 degree	2.75996
Cameroon	2034	industry	1.5 degree	4.36192
Chile	2034	industry	1.5 degree	11.2468
Colombia	2034	industry	1.5 degree	46.9166
Cote d`Ivoire	2034	industry	1.5 degree	3.19893
Democratic Republic of the Congo	2034	industry	1.5 degree	1.54668
Egypt	2034	industry	1.5 degree	37.0153
Eritrea	2034	industry	1.5 degree	0.371515
Ethiopia	2034	industry	1.5 degree	7.33737
Georgia	2034	industry	1.5 degree	0.413151
Ghana	2034	industry	1.5 degree	4.60958
Guatemala	2034	industry	1.5 degree	1.42758
Haiti	2034	industry	1.5 degree	0.701774
Honduras	2034	industry	1.5 degree	0.769813
Indonesia	2034	industry	1.5 degree	192.687
Iraq	2034	industry	1.5 degree	46.4363
Jordan	2034	industry	1.5 degree	7.11955
Kenya	2034	industry	1.5 degree	11.2061
Kyrgyzstan	2034	industry	1.5 degree	0.788667
Lao People`s Democratic Republic	2034	industry	1.5 degree	7.58113
Lebanon	2034	industry	1.5 degree	7.85027
Mali	2034	industry	1.5 degree	1.79191
Mongolia	2034	industry	1.5 degree	1.68635
Morocco	2034	industry	1.5 degree	11.4785
Mozambique	2034	industry	1.5 degree	3.38468
Myanmar	2034	industry	1.5 degree	3.73604
Namibia	2034	industry	1.5 degree	2.7631
Nepal	2034	industry	1.5 degree	7.89201
Nicaragua	2034	industry	1.5 degree	0.414603
Niger	2034	industry	1.5 degree	0.699965
Nigeria	2034	industry	1.5 degree	45.1288
Oman	2034	industry	1.5 degree	22.8026
Pakistan	2034	industry	1.5 degree	74.7775
Paraguay	2034	industry	1.5 degree	0.00406328
Peru	2034	industry	1.5 degree	6.93712
Philippines	2034	industry	1.5 degree	62.6972
Qatar	2034	industry	1.5 degree	26.0236
Republic of the Congo	2034	industry	1.5 degree	2.07786
Saudi Arabia	2034	industry	1.5 degree	58.7655
Senegal	2034	industry	1.5 degree	2.49631
South Sudan	2034	industry	1.5 degree	1.48477
Sri Lanka	2034	industry	1.5 degree	3.51551
Sudan	2034	industry	1.5 degree	9.28539
Tajikistan	2034	industry	1.5 degree	6.41166
Turkey	2034	industry	1.5 degree	129.676
Turkmenistan	2034	industry	1.5 degree	52.6148
Uganda	2034	industry	1.5 degree	2.64808
United Arab Emirates	2034	industry	1.5 degree	58.8327
United Republic of Tanzania	2034	industry	1.5 degree	3.19702
Viet Nam	2034	industry	1.5 degree	104.995
Zambia	2034	industry	1.5 degree	4.217
Algeria	2035	industry	1.5 degree	25.5004
Angola	2035	industry	1.5 degree	14.0878
Armenia	2035	industry	1.5 degree	0.259088
Azerbaijan	2035	industry	1.5 degree	3.4192
Bangladesh	2035	industry	1.5 degree	28.8946
Benin	2035	industry	1.5 degree	2.27263
Bolivia (Plurinational State of)	2035	industry	1.5 degree	1.05505
Botswana	2035	industry	1.5 degree	6.56385
Cambodia	2035	industry	1.5 degree	2.78494
Cameroon	2035	industry	1.5 degree	4.62138
Chile	2035	industry	1.5 degree	10.8948
Colombia	2035	industry	1.5 degree	46.92
Cote d`Ivoire	2035	industry	1.5 degree	3.27807
Democratic Republic of the Congo	2035	industry	1.5 degree	1.63869
Egypt	2035	industry	1.5 degree	36.4553
Eritrea	2035	industry	1.5 degree	0.384979
Ethiopia	2035	industry	1.5 degree	7.60328
Georgia	2035	industry	1.5 degree	0.417219
Ghana	2035	industry	1.5 degree	4.72361
Guatemala	2035	industry	1.5 degree	1.34326
Haiti	2035	industry	1.5 degree	0.669136
Honduras	2035	industry	1.5 degree	0.724344
Indonesia	2035	industry	1.5 degree	202.781
Iraq	2035	industry	1.5 degree	45.9246
Jordan	2035	industry	1.5 degree	7.0411
Kenya	2035	industry	1.5 degree	11.6426
Kyrgyzstan	2035	industry	1.5 degree	0.779032
Lao People`s Democratic Republic	2035	industry	1.5 degree	7.58353
Lebanon	2035	industry	1.5 degree	7.76377
Mali	2035	industry	1.5 degree	1.83624
Mongolia	2035	industry	1.5 degree	1.69815
Morocco	2035	industry	1.5 degree	10.9552
Mozambique	2035	industry	1.5 degree	3.50734
Myanmar	2035	industry	1.5 degree	3.57262
Namibia	2035	industry	1.5 degree	2.92746
Nepal	2035	industry	1.5 degree	8.09521
Nicaragua	2035	industry	1.5 degree	0.390114
Niger	2035	industry	1.5 degree	0.717281
Nigeria	2035	industry	1.5 degree	45.7224
Oman	2035	industry	1.5 degree	22.5513
Pakistan	2035	industry	1.5 degree	76.0648
Paraguay	2035	industry	1.5 degree	0.00368178
Peru	2035	industry	1.5 degree	6.7049
Philippines	2035	industry	1.5 degree	63.2932
Qatar	2035	industry	1.5 degree	25.7369
Republic of the Congo	2035	industry	1.5 degree	2.20146
Saudi Arabia	2035	industry	1.5 degree	55.3345
Senegal	2035	industry	1.5 degree	2.55807
South Sudan	2035	industry	1.5 degree	1.53858
Sri Lanka	2035	industry	1.5 degree	3.62801
Sudan	2035	industry	1.5 degree	9.6219
Tajikistan	2035	industry	1.5 degree	6.19566
Turkey	2035	industry	1.5 degree	121.447
Turkmenistan	2035	industry	1.5 degree	50.8422
Uganda	2035	industry	1.5 degree	2.74405
United Arab Emirates	2035	industry	1.5 degree	58.1844
United Republic of Tanzania	2035	industry	1.5 degree	3.33588
Viet Nam	2035	industry	1.5 degree	104.739
Zambia	2035	industry	1.5 degree	4.36982
Algeria	2036	industry	1.5 degree	24.8382
Angola	2036	industry	1.5 degree	15.2509
Armenia	2036	industry	1.5 degree	0.268823
Azerbaijan	2036	industry	1.5 degree	3.43177
Bangladesh	2036	industry	1.5 degree	28.7206
Benin	2036	industry	1.5 degree	2.28032
Bolivia (Plurinational State of)	2036	industry	1.5 degree	0.995969
Botswana	2036	industry	1.5 degree	7.10578
Cambodia	2036	industry	1.5 degree	2.57016
Cameroon	2036	industry	1.5 degree	5.00293
Chile	2036	industry	1.5 degree	10.6702
Colombia	2036	industry	1.5 degree	47.5184
Cote d`Ivoire	2036	industry	1.5 degree	3.28917
Democratic Republic of the Congo	2036	industry	1.5 degree	1.77398
Egypt	2036	industry	1.5 degree	35.4439
Eritrea	2036	industry	1.5 degree	0.389941
Ethiopia	2036	industry	1.5 degree	7.70128
Georgia	2036	industry	1.5 degree	0.423315
Ghana	2036	industry	1.5 degree	4.7396
Guatemala	2036	industry	1.5 degree	1.32105
Haiti	2036	industry	1.5 degree	0.649693
Honduras	2036	industry	1.5 degree	0.71237
Indonesia	2036	industry	1.5 degree	212.224
Iraq	2036	industry	1.5 degree	44.7939
Jordan	2036	industry	1.5 degree	6.86774
Kenya	2036	industry	1.5 degree	11.8178
Kyrgyzstan	2036	industry	1.5 degree	0.751316
Lao People`s Democratic Republic	2036	industry	1.5 degree	7.60309
Lebanon	2036	industry	1.5 degree	7.57262
Mali	2036	industry	1.5 degree	1.84246
Mongolia	2036	industry	1.5 degree	1.62871
Morocco	2036	industry	1.5 degree	10.6708
Mozambique	2036	industry	1.5 degree	3.55255
Myanmar	2036	industry	1.5 degree	3.41939
Namibia	2036	industry	1.5 degree	3.16916
Nepal	2036	industry	1.5 degree	8.34924
Nicaragua	2036	industry	1.5 degree	0.383665
Niger	2036	industry	1.5 degree	0.719709
Nigeria	2036	industry	1.5 degree	45.1907
Oman	2036	industry	1.5 degree	21.9961
Pakistan	2036	industry	1.5 degree	75.745
Paraguay	2036	industry	1.5 degree	0.00362225
Peru	2036	industry	1.5 degree	6.6757
Philippines	2036	industry	1.5 degree	64.4013
Qatar	2036	industry	1.5 degree	25.1032
Republic of the Congo	2036	industry	1.5 degree	2.38322
Saudi Arabia	2036	industry	1.5 degree	53.4676
Senegal	2036	industry	1.5 degree	2.56673
South Sudan	2036	industry	1.5 degree	1.55841
Sri Lanka	2036	industry	1.5 degree	3.58611
Sudan	2036	industry	1.5 degree	9.74591
Tajikistan	2036	industry	1.5 degree	6.07152
Turkey	2036	industry	1.5 degree	108.36
Turkmenistan	2036	industry	1.5 degree	49.8235
Uganda	2036	industry	1.5 degree	2.77942
United Arab Emirates	2036	industry	1.5 degree	56.7519
United Republic of Tanzania	2036	industry	1.5 degree	3.40072
Viet Nam	2036	industry	1.5 degree	105.452
Zambia	2036	industry	1.5 degree	4.42615
Algeria	2037	industry	1.5 degree	24.0827
Angola	2037	industry	1.5 degree	16.1543
Armenia	2037	industry	1.5 degree	0.277263
Azerbaijan	2037	industry	1.5 degree	3.43148
Bangladesh	2037	industry	1.5 degree	28.4078
Benin	2037	industry	1.5 degree	2.27045
Bolivia (Plurinational State of)	2037	industry	1.5 degree	0.935434
Botswana	2037	industry	1.5 degree	7.52668
Cambodia	2037	industry	1.5 degree	2.34905
Cameroon	2037	industry	1.5 degree	5.29927
Chile	2037	industry	1.5 degree	10.4127
Colombia	2037	industry	1.5 degree	47.7898
Cote d`Ivoire	2037	industry	1.5 degree	3.27493
Democratic Republic of the Congo	2037	industry	1.5 degree	1.87906
Egypt	2037	industry	1.5 degree	34.3094
Eritrea	2037	industry	1.5 degree	0.391515
Ethiopia	2037	industry	1.5 degree	7.73236
Georgia	2037	industry	1.5 degree	0.427484
Ghana	2037	industry	1.5 degree	4.71909
Guatemala	2037	industry	1.5 degree	1.29311
Haiti	2037	industry	1.5 degree	0.627647
Honduras	2037	industry	1.5 degree	0.6973
Indonesia	2037	industry	1.5 degree	220.608
Iraq	2037	industry	1.5 degree	43.48
Jordan	2037	industry	1.5 degree	6.6663
Kenya	2037	industry	1.5 degree	11.8875
Kyrgyzstan	2037	industry	1.5 degree	0.719761
Lao People`s Democratic Republic	2037	industry	1.5 degree	7.58588
Lebanon	2037	industry	1.5 degree	7.3505
Mali	2037	industry	1.5 degree	1.83448
Mongolia	2037	industry	1.5 degree	1.55423
Morocco	2037	industry	1.5 degree	10.3462
Mozambique	2037	industry	1.5 degree	3.56689
Myanmar	2037	industry	1.5 degree	3.251
Namibia	2037	industry	1.5 degree	3.35687
Nepal	2037	industry	1.5 degree	8.55243
Nicaragua	2037	industry	1.5 degree	0.375549
Niger	2037	industry	1.5 degree	0.716594
Nigeria	2037	industry	1.5 degree	44.4297
Oman	2037	industry	1.5 degree	21.3509
Pakistan	2037	industry	1.5 degree	75.057
Paraguay	2037	industry	1.5 degree	0.00354906
Peru	2037	industry	1.5 degree	6.60999
Philippines	2037	industry	1.5 degree	65.184
Qatar	2037	industry	1.5 degree	24.3669
Republic of the Congo	2037	industry	1.5 degree	2.52438
Saudi Arabia	2037	industry	1.5 degree	51.3722
Senegal	2037	industry	1.5 degree	2.55562
South Sudan	2037	industry	1.5 degree	1.5647
Sri Lanka	2037	industry	1.5 degree	3.52761
Sudan	2037	industry	1.5 degree	9.78525
Tajikistan	2037	industry	1.5 degree	5.92663
Turkey	2037	industry	1.5 degree	95.0482
Turkmenistan	2037	industry	1.5 degree	48.6346
Uganda	2037	industry	1.5 degree	2.79063
United Arab Emirates	2037	industry	1.5 degree	55.0872
United Republic of Tanzania	2037	industry	1.5 degree	3.4349
Viet Nam	2037	industry	1.5 degree	105.668
Zambia	2037	industry	1.5 degree	4.44401
Algeria	2038	industry	1.5 degree	23.2264
Angola	2038	industry	1.5 degree	16.7515
Armenia	2038	industry	1.5 degree	0.284219
Azerbaijan	2038	industry	1.5 degree	3.41694
Bangladesh	2038	industry	1.5 degree	27.9382
Benin	2038	industry	1.5 degree	2.24095
Bolivia (Plurinational State of)	2038	industry	1.5 degree	0.873274
Botswana	2038	industry	1.5 degree	7.80495
Cambodia	2038	industry	1.5 degree	2.12108
Cameroon	2038	industry	1.5 degree	5.49519
Chile	2038	industry	1.5 degree	10.1181
Colombia	2038	industry	1.5 degree	47.6878
Cote d`Ivoire	2038	industry	1.5 degree	3.23238
Democratic Republic of the Congo	2038	industry	1.5 degree	1.94853
Egypt	2038	industry	1.5 degree	33.0399
Eritrea	2038	industry	1.5 degree	0.389263
Ethiopia	2038	industry	1.5 degree	7.68789
Georgia	2038	industry	1.5 degree	0.429489
Ghana	2038	industry	1.5 degree	4.65777
Guatemala	2038	industry	1.5 degree	1.25877
Haiti	2038	industry	1.5 degree	0.602758
Honduras	2038	industry	1.5 degree	0.678783
Indonesia	2038	industry	1.5 degree	227.766
Iraq	2038	industry	1.5 degree	41.9641
Jordan	2038	industry	1.5 degree	6.43388
Kenya	2038	industry	1.5 degree	11.838
Kyrgyzstan	2038	industry	1.5 degree	0.683952
Lao People`s Democratic Republic	2038	industry	1.5 degree	7.52618
Lebanon	2038	industry	1.5 degree	7.09423
Mali	2038	industry	1.5 degree	1.81065
Mongolia	2038	industry	1.5 degree	1.47412
Morocco	2038	industry	1.5 degree	9.97835
Mozambique	2038	industry	1.5 degree	3.54637
Myanmar	2038	industry	1.5 degree	3.06581
Namibia	2038	industry	1.5 degree	3.48098
Nepal	2038	industry	1.5 degree	8.69818
Nicaragua	2038	industry	1.5 degree	0.365576
Niger	2038	industry	1.5 degree	0.707284
Nigeria	2038	industry	1.5 degree	43.4183
Oman	2038	industry	1.5 degree	20.6065
Pakistan	2038	industry	1.5 degree	73.9541
Paraguay	2038	industry	1.5 degree	0.00346052
Peru	2038	industry	1.5 degree	6.50289
Philippines	2038	industry	1.5 degree	65.5865
Qatar	2038	industry	1.5 degree	23.5174
Republic of the Congo	2038	industry	1.5 degree	2.61771
Saudi Arabia	2038	industry	1.5 degree	49.0292
Senegal	2038	industry	1.5 degree	2.52241
South Sudan	2038	industry	1.5 degree	1.5557
Sri Lanka	2038	industry	1.5 degree	3.45062
Sudan	2038	industry	1.5 degree	9.72897
Tajikistan	2038	industry	1.5 degree	5.75941
Turkey	2038	industry	1.5 degree	81.1263
Turkmenistan	2038	industry	1.5 degree	47.2623
Uganda	2038	industry	1.5 degree	2.77458
United Arab Emirates	2038	industry	1.5 degree	53.1666
United Republic of Tanzania	2038	industry	1.5 degree	3.43413
Viet Nam	2038	industry	1.5 degree	105.321
Zambia	2038	industry	1.5 degree	4.41845
Algeria	2039	industry	1.5 degree	22.2614
Angola	2039	industry	1.5 degree	16.9881
Armenia	2039	industry	1.5 degree	0.289472
Azerbaijan	2039	industry	1.5 degree	3.38659
Bangladesh	2039	industry	1.5 degree	27.2917
Benin	2039	industry	1.5 degree	2.18952
Bolivia (Plurinational State of)	2039	industry	1.5 degree	0.809306
Botswana	2039	industry	1.5 degree	7.91516
Cambodia	2039	industry	1.5 degree	1.88566
Cameroon	2039	industry	1.5 degree	5.57279
Chile	2039	industry	1.5 degree	9.78155
Colombia	2039	industry	1.5 degree	47.159
Cote d`Ivoire	2039	industry	1.5 degree	3.15819
Democratic Republic of the Congo	2039	industry	1.5 degree	1.97604
Egypt	2039	industry	1.5 degree	31.6222
Eritrea	2039	industry	1.5 degree	0.382692
Ethiopia	2039	industry	1.5 degree	7.5581
Georgia	2039	industry	1.5 degree	0.429064
Ghana	2039	industry	1.5 degree	4.55087
Guatemala	2039	industry	1.5 degree	1.21731
Haiti	2039	industry	1.5 degree	0.574759
Honduras	2039	industry	1.5 degree	0.656429
Indonesia	2039	industry	1.5 degree	233.503
Iraq	2039	industry	1.5 degree	40.2255
Jordan	2039	industry	1.5 degree	6.16732
Kenya	2039	industry	1.5 degree	11.6533
Kyrgyzstan	2039	industry	1.5 degree	0.643434
Lao People`s Democratic Republic	2039	industry	1.5 degree	7.41732
Lebanon	2039	industry	1.5 degree	6.80031
Mali	2039	industry	1.5 degree	1.76909
Mongolia	2039	industry	1.5 degree	1.3877
Morocco	2039	industry	1.5 degree	9.56374
Mozambique	2039	industry	1.5 degree	3.4865
Myanmar	2039	industry	1.5 degree	2.86201
Namibia	2039	industry	1.5 degree	3.53014
Nepal	2039	industry	1.5 degree	8.77905
Nicaragua	2039	industry	1.5 degree	0.353537
Niger	2039	industry	1.5 degree	0.69105
Nigeria	2039	industry	1.5 degree	42.1332
Oman	2039	industry	1.5 degree	19.7528
Pakistan	2039	industry	1.5 degree	72.384
Paraguay	2039	industry	1.5 degree	0.00335479
Peru	2039	industry	1.5 degree	6.3488
Philippines	2039	industry	1.5 degree	65.5436
Qatar	2039	industry	1.5 degree	22.543
Republic of the Congo	2039	industry	1.5 degree	2.65467
Saudi Arabia	2039	industry	1.5 degree	46.4179
Senegal	2039	industry	1.5 degree	2.46452
South Sudan	2039	industry	1.5 degree	1.52944
Sri Lanka	2039	industry	1.5 degree	3.35304
Sudan	2039	industry	1.5 degree	9.56472
Tajikistan	2039	industry	1.5 degree	5.56815
Turkey	2039	industry	1.5 degree	66.498
Turkmenistan	2039	industry	1.5 degree	45.6929
Uganda	2039	industry	1.5 degree	2.72774
United Arab Emirates	2039	industry	1.5 degree	50.9639
United Republic of Tanzania	2039	industry	1.5 degree	3.39346
Viet Nam	2039	industry	1.5 degree	104.332
Zambia	2039	industry	1.5 degree	4.34386
Algeria	2040	industry	1.5 degree	21.1787
Angola	2040	industry	1.5 degree	16.7995
Armenia	2040	industry	1.5 degree	0.292771
Azerbaijan	2040	industry	1.5 degree	3.33871
Bangladesh	2040	industry	1.5 degree	26.4453
Benin	2040	industry	1.5 degree	2.11357
Bolivia (Plurinational State of)	2040	industry	1.5 degree	0.74332
Botswana	2040	industry	1.5 degree	7.8273
Cambodia	2040	industry	1.5 degree	1.64215
Cameroon	2040	industry	1.5 degree	5.51093
Chile	2040	industry	1.5 degree	9.3972
Colombia	2040	industry	1.5 degree	46.1422
Cote d`Ivoire	2040	industry	1.5 degree	3.04863
Democratic Republic of the Congo	2040	industry	1.5 degree	1.95411
Egypt	2040	industry	1.5 degree	30.0417
Eritrea	2040	industry	1.5 degree	0.371242
Ethiopia	2040	industry	1.5 degree	7.33196
Georgia	2040	industry	1.5 degree	0.425908
Ghana	2040	industry	1.5 degree	4.393
Guatemala	2040	industry	1.5 degree	1.16793
Haiti	2040	industry	1.5 degree	0.54336
Honduras	2040	industry	1.5 degree	0.629798
Indonesia	2040	industry	1.5 degree	237.588
Iraq	2040	industry	1.5 degree	38.2412
Jordan	2040	industry	1.5 degree	5.8631
Kenya	2040	industry	1.5 degree	11.3157
Kyrgyzstan	2040	industry	1.5 degree	0.597698
Lao People`s Democratic Republic	2040	industry	1.5 degree	7.25158
Lebanon	2040	industry	1.5 degree	6.46486
Mali	2040	industry	1.5 degree	1.70772
Mongolia	2040	industry	1.5 degree	1.29424
Morocco	2040	industry	1.5 degree	9.09861
Mozambique	2040	industry	1.5 degree	3.38219
Myanmar	2040	industry	1.5 degree	2.63761
Namibia	2040	industry	1.5 degree	3.49095
Nepal	2040	industry	1.5 degree	8.78665
Nicaragua	2040	industry	1.5 degree	0.339194
Niger	2040	industry	1.5 degree	0.667078
Nigeria	2040	industry	1.5 degree	40.5491
Oman	2040	industry	1.5 degree	18.7784
Pakistan	2040	industry	1.5 degree	70.2874
Paraguay	2040	industry	1.5 degree	0.00322978
Peru	2040	industry	1.5 degree	6.14128
Philippines	2040	industry	1.5 degree	64.978
Qatar	2040	industry	1.5 degree	21.431
Republic of the Congo	2040	industry	1.5 degree	2.62521
Saudi Arabia	2040	industry	1.5 degree	43.516
Senegal	2040	industry	1.5 degree	2.37902
South Sudan	2040	industry	1.5 degree	1.48368
Sri Lanka	2040	industry	1.5 degree	3.23254
Sudan	2040	industry	1.5 degree	9.27855
Tajikistan	2040	industry	1.5 degree	5.35103
Turkey	2040	industry	1.5 degree	51.0313
Turkmenistan	2040	industry	1.5 degree	43.9111
Uganda	2040	industry	1.5 degree	2.64613
United Arab Emirates	2040	industry	1.5 degree	48.4499
United Republic of Tanzania	2040	industry	1.5 degree	3.30726
Viet Nam	2040	industry	1.5 degree	102.613
Zambia	2040	industry	1.5 degree	4.21389
Algeria	2041	industry	1.5 degree	20.0718
Angola	2041	industry	1.5 degree	18.7948
Armenia	2041	industry	1.5 degree	0.280043
Azerbaijan	2041	industry	1.5 degree	3.12393
Bangladesh	2041	industry	1.5 degree	25.2046
Benin	2041	industry	1.5 degree	2.12571
Bolivia (Plurinational State of)	2041	industry	1.5 degree	0.683447
Botswana	2041	industry	1.5 degree	8.75696
Cambodia	2041	industry	1.5 degree	1.56984
Cameroon	2041	industry	1.5 degree	6.16547
Chile	2041	industry	1.5 degree	8.93096
Colombia	2041	industry	1.5 degree	45.0037
Cote d`Ivoire	2041	industry	1.5 degree	3.06615
Democratic Republic of the Congo	2041	industry	1.5 degree	2.1862
Egypt	2041	industry	1.5 degree	28.5576
Eritrea	2041	industry	1.5 degree	0.379498
Ethiopia	2041	industry	1.5 degree	7.49502
Georgia	2041	industry	1.5 degree	0.40331
Ghana	2041	industry	1.5 degree	4.41825
Guatemala	2041	industry	1.5 degree	1.11582
Haiti	2041	industry	1.5 degree	0.515027
Honduras	2041	industry	1.5 degree	0.601701
Indonesia	2041	industry	1.5 degree	233.117
Iraq	2041	industry	1.5 degree	36.6003
Jordan	2041	industry	1.5 degree	5.61151
Kenya	2041	industry	1.5 degree	11.607
Kyrgyzstan	2041	industry	1.5 degree	0.575121
Lao People`s Democratic Republic	2041	industry	1.5 degree	7.13759
Lebanon	2041	industry	1.5 degree	6.18745
Mali	2041	industry	1.5 degree	1.71754
Mongolia	2041	industry	1.5 degree	1.25141
Morocco	2041	industry	1.5 degree	8.62306
Mozambique	2041	industry	1.5 degree	3.4574
Myanmar	2041	industry	1.5 degree	2.53865
Namibia	2041	industry	1.5 degree	3.90558
Nepal	2041	industry	1.5 degree	8.52976
Nicaragua	2041	industry	1.5 degree	0.324062
Niger	2041	industry	1.5 degree	0.670912
Nigeria	2041	industry	1.5 degree	39.5553
Oman	2041	industry	1.5 degree	17.9726
Pakistan	2041	industry	1.5 degree	67.1863
Paraguay	2041	industry	1.5 degree	0.00308919
Peru	2041	industry	1.5 degree	5.93547
Philippines	2041	industry	1.5 degree	64.5783
Qatar	2041	industry	1.5 degree	20.5114
Republic of the Congo	2041	industry	1.5 degree	2.93701
Saudi Arabia	2041	industry	1.5 degree	41.4142
Senegal	2041	industry	1.5 degree	2.3927
South Sudan	2041	industry	1.5 degree	1.51668
Sri Lanka	2041	industry	1.5 degree	3.14042
Sudan	2041	industry	1.5 degree	9.4849
Tajikistan	2041	industry	1.5 degree	5.07399
Turkey	2041	industry	1.5 degree	50.2683
Turkmenistan	2041	industry	1.5 degree	41.6377
Uganda	2041	industry	1.5 degree	2.70498
United Arab Emirates	2041	industry	1.5 degree	46.3709
United Republic of Tanzania	2041	industry	1.5 degree	3.41402
Viet Nam	2041	industry	1.5 degree	99.6448
Zambia	2041	industry	1.5 degree	4.3076
Algeria	2042	industry	1.5 degree	18.8264
Angola	2042	industry	1.5 degree	20.1996
Armenia	2042	industry	1.5 degree	0.264745
Azerbaijan	2042	industry	1.5 degree	2.88759
Bangladesh	2042	industry	1.5 degree	23.7092
Benin	2042	industry	1.5 degree	2.10724
Bolivia (Plurinational State of)	2042	industry	1.5 degree	0.621067
Botswana	2042	industry	1.5 degree	9.41147
Cambodia	2042	industry	1.5 degree	1.48802
Cameroon	2042	industry	1.5 degree	6.62629
Chile	2042	industry	1.5 degree	8.40136
Colombia	2042	industry	1.5 degree	43.2252
Cote d`Ivoire	2042	industry	1.5 degree	3.03951
Democratic Republic of the Congo	2042	industry	1.5 degree	2.3496
Egypt	2042	industry	1.5 degree	26.877
Eritrea	2042	industry	1.5 degree	0.381533
Ethiopia	2042	industry	1.5 degree	7.53522
Georgia	2042	industry	1.5 degree	0.377262
Ghana	2042	industry	1.5 degree	4.37986
Guatemala	2042	industry	1.5 degree	1.05383
Haiti	2042	industry	1.5 degree	0.482621
Honduras	2042	industry	1.5 degree	0.568273
Indonesia	2042	industry	1.5 degree	226.409
Iraq	2042	industry	1.5 degree	34.6604
Jordan	2042	industry	1.5 degree	5.31408
Kenya	2042	industry	1.5 degree	11.7023
Kyrgyzstan	2042	industry	1.5 degree	0.546149
Lao People`s Democratic Republic	2042	industry	1.5 degree	6.94732
Lebanon	2042	industry	1.5 degree	5.8595
Mali	2042	industry	1.5 degree	1.70261
Mongolia	2042	industry	1.5 degree	1.19971
Morocco	2042	industry	1.5 degree	8.08803
Mozambique	2042	industry	1.5 degree	3.47595
Myanmar	2042	industry	1.5 degree	2.41439
Namibia	2042	industry	1.5 degree	4.19748
Nepal	2042	industry	1.5 degree	8.17939
Nicaragua	2042	industry	1.5 degree	0.306058
Niger	2042	industry	1.5 degree	0.665082
Nigeria	2042	industry	1.5 degree	38.2045
Oman	2042	industry	1.5 degree	17.02
Pakistan	2042	industry	1.5 degree	63.4172
Paraguay	2042	industry	1.5 degree	0.00292436
Peru	2042	industry	1.5 degree	5.6602
Philippines	2042	industry	1.5 degree	63.4521
Qatar	2042	industry	1.5 degree	19.4242
Republic of the Congo	2042	industry	1.5 degree	3.15652
Saudi Arabia	2042	industry	1.5 degree	38.9708
Senegal	2042	industry	1.5 degree	2.37191
South Sudan	2042	industry	1.5 degree	1.52481
Sri Lanka	2042	industry	1.5 degree	3.01988
Sudan	2042	industry	1.5 degree	9.53577
Tajikistan	2042	industry	1.5 degree	4.76694
Turkey	2042	industry	1.5 degree	48.5828
Turkmenistan	2042	industry	1.5 degree	39.118
Uganda	2042	industry	1.5 degree	2.71948
United Arab Emirates	2042	industry	1.5 degree	43.9131
United Republic of Tanzania	2042	industry	1.5 degree	3.46146
Viet Nam	2042	industry	1.5 degree	95.7279
Zambia	2042	industry	1.5 degree	4.33071
Algeria	2043	industry	1.5 degree	17.4312
Angola	2043	industry	1.5 degree	20.9074
Armenia	2043	industry	1.5 degree	0.2465
Azerbaijan	2043	industry	1.5 degree	2.62734
Bangladesh	2043	industry	1.5 degree	21.9264
Benin	2043	industry	1.5 degree	2.05453
Bolivia (Plurinational State of)	2043	industry	1.5 degree	0.555891
Botswana	2043	industry	1.5 degree	9.74127
Cambodia	2043	industry	1.5 degree	1.39588
Cameroon	2043	industry	1.5 degree	6.85849
Chile	2043	industry	1.5 degree	7.7985
Colombia	2043	industry	1.5 degree	40.7129
Cote d`Ivoire	2043	industry	1.5 degree	2.96348
Democratic Republic of the Congo	2043	industry	1.5 degree	2.43194
Egypt	2043	industry	1.5 degree	24.9801
Eritrea	2043	industry	1.5 degree	0.376542
Ethiopia	2043	industry	1.5 degree	7.43664
Georgia	2043	industry	1.5 degree	0.347334
Ghana	2043	industry	1.5 degree	4.2703
Guatemala	2043	industry	1.5 degree	0.980793
Haiti	2043	industry	1.5 degree	0.445756
Honduras	2043	industry	1.5 degree	0.528887
Indonesia	2043	industry	1.5 degree	217.092
Iraq	2043	industry	1.5 degree	32.3906
Jordan	2043	industry	1.5 degree	4.96608
Kenya	2043	industry	1.5 degree	11.5757
Kyrgyzstan	2043	industry	1.5 degree	0.510093
Lao People`s Democratic Republic	2043	industry	1.5 degree	6.66863
Lebanon	2043	industry	1.5 degree	5.47578
Mali	2043	industry	1.5 degree	1.66002
Mongolia	2043	industry	1.5 degree	1.13806
Morocco	2043	industry	1.5 degree	7.48864
Mozambique	2043	industry	1.5 degree	3.43048
Myanmar	2043	industry	1.5 degree	2.26212
Namibia	2043	industry	1.5 degree	4.34458
Nepal	2043	industry	1.5 degree	7.72343
Nicaragua	2043	industry	1.5 degree	0.284846
Niger	2043	industry	1.5 degree	0.648446
Nigeria	2043	industry	1.5 degree	36.4638
Oman	2043	industry	1.5 degree	15.9054
Pakistan	2043	industry	1.5 degree	58.8957
Paraguay	2043	industry	1.5 degree	0.00273232
Peru	2043	industry	1.5 degree	5.30563
Philippines	2043	industry	1.5 degree	61.4675
Qatar	2043	industry	1.5 degree	18.1522
Republic of the Congo	2043	industry	1.5 degree	3.26714
Saudi Arabia	2043	industry	1.5 degree	36.1573
Senegal	2043	industry	1.5 degree	2.31258
South Sudan	2043	industry	1.5 degree	1.50486
Sri Lanka	2043	industry	1.5 degree	2.8677
Sudan	2043	industry	1.5 degree	9.41103
Tajikistan	2043	industry	1.5 degree	4.42753
Turkey	2043	industry	1.5 degree	45.8571
Turkmenistan	2043	industry	1.5 degree	36.3328
Uganda	2043	industry	1.5 degree	2.68391
United Arab Emirates	2043	industry	1.5 degree	41.0374
United Republic of Tanzania	2043	industry	1.5 degree	3.44119
Viet Nam	2043	industry	1.5 degree	90.7273
Zambia	2043	industry	1.5 degree	4.27405
Algeria	2044	industry	1.5 degree	15.8738
Angola	2044	industry	1.5 degree	20.793
Armenia	2044	industry	1.5 degree	0.224873
Azerbaijan	2044	industry	1.5 degree	2.34057
Bangladesh	2044	industry	1.5 degree	19.8191
Benin	2044	industry	1.5 degree	1.96353
Bolivia (Plurinational State of)	2044	industry	1.5 degree	0.4876
Botswana	2044	industry	1.5 degree	9.68796
Cambodia	2044	industry	1.5 degree	1.29254
Cameroon	2044	industry	1.5 degree	6.82095
Chile	2044	industry	1.5 degree	7.11043
Colombia	2044	industry	1.5 degree	37.3589
Cote d`Ivoire	2044	industry	1.5 degree	2.83221
Democratic Republic of the Congo	2044	industry	1.5 degree	2.41863
Egypt	2044	industry	1.5 degree	22.8455
Eritrea	2044	industry	1.5 degree	0.363614
Ethiopia	2044	industry	1.5 degree	7.18131
Georgia	2044	industry	1.5 degree	0.313041
Ghana	2044	industry	1.5 degree	4.08115
Guatemala	2044	industry	1.5 degree	0.895403
Haiti	2044	industry	1.5 degree	0.404005
Honduras	2044	industry	1.5 degree	0.482841
Indonesia	2044	industry	1.5 degree	204.729
Iraq	2044	industry	1.5 degree	29.7567
Jordan	2044	industry	1.5 degree	4.56226
Kenya	2044	industry	1.5 degree	11.1978
Kyrgyzstan	2044	industry	1.5 degree	0.466194
Lao People`s Democratic Republic	2044	industry	1.5 degree	6.28743
Lebanon	2044	industry	1.5 degree	5.03051
Mali	2044	industry	1.5 degree	1.58649
Mongolia	2044	industry	1.5 degree	1.06523
Morocco	2044	industry	1.5 degree	6.81958
Mozambique	2044	industry	1.5 degree	3.31269
Myanmar	2044	industry	1.5 degree	2.0788
Namibia	2044	industry	1.5 degree	4.3208
Nepal	2044	industry	1.5 degree	7.1482
Nicaragua	2044	industry	1.5 degree	0.260046
Niger	2044	industry	1.5 degree	0.619723
Nigeria	2044	industry	1.5 degree	34.2968
Oman	2044	industry	1.5 degree	14.612
Pakistan	2044	industry	1.5 degree	53.5264
Paraguay	2044	industry	1.5 degree	0.00250978
Peru	2044	industry	1.5 degree	4.86039
Philippines	2044	industry	1.5 degree	58.4665
Qatar	2044	industry	1.5 degree	16.6762
Republic of the Congo	2044	industry	1.5 degree	3.24926
Saudi Arabia	2044	industry	1.5 degree	32.9423
Senegal	2044	industry	1.5 degree	2.21014
South Sudan	2044	industry	1.5 degree	1.4532
Sri Lanka	2044	industry	1.5 degree	2.68028
Sudan	2044	industry	1.5 degree	9.08791
Tajikistan	2044	industry	1.5 degree	4.05326
Turkey	2044	industry	1.5 degree	41.9582
Turkmenistan	2044	industry	1.5 degree	33.2615
Uganda	2044	industry	1.5 degree	2.59176
United Arab Emirates	2044	industry	1.5 degree	37.7004
United Republic of Tanzania	2044	industry	1.5 degree	3.34361
Viet Nam	2044	industry	1.5 degree	84.488
Zambia	2044	industry	1.5 degree	4.12731
Algeria	2045	industry	1.5 degree	14.1408
Angola	2045	industry	1.5 degree	19.7083
Armenia	2045	industry	1.5 degree	0.199366
Azerbaijan	2045	industry	1.5 degree	2.0244
Bangladesh	2045	industry	1.5 degree	17.3454
Benin	2045	industry	1.5 degree	1.82968
Bolivia (Plurinational State of)	2045	industry	1.5 degree	0.415834
Botswana	2045	industry	1.5 degree	9.18259
Cambodia	2045	industry	1.5 degree	1.17705
Cameroon	2045	industry	1.5 degree	6.46514
Chile	2045	industry	1.5 degree	6.32267
Colombia	2045	industry	1.5 degree	33.039
Cote d`Ivoire	2045	industry	1.5 degree	2.63915
Democratic Republic of the Congo	2045	industry	1.5 degree	2.29246
Egypt	2045	industry	1.5 degree	20.4492
Eritrea	2045	industry	1.5 degree	0.341719
Ethiopia	2045	industry	1.5 degree	6.74889
Georgia	2045	industry	1.5 degree	0.273836
Ghana	2045	industry	1.5 degree	3.80294
Guatemala	2045	industry	1.5 degree	0.79619
Haiti	2045	industry	1.5 degree	0.356901
Honduras	2045	industry	1.5 degree	0.429341
Indonesia	2045	industry	1.5 degree	188.805
Iraq	2045	industry	1.5 degree	26.721
Jordan	2045	industry	1.5 degree	4.09683
Kenya	2045	industry	1.5 degree	10.5354
Kyrgyzstan	2045	industry	1.5 degree	0.413608
Lao People`s Democratic Republic	2045	industry	1.5 degree	5.78733
Lebanon	2045	industry	1.5 degree	4.51731
Mali	2045	industry	1.5 degree	1.47834
Mongolia	2045	industry	1.5 degree	0.979806
Morocco	2045	industry	1.5 degree	6.07507
Mozambique	2045	industry	1.5 degree	3.11322
Myanmar	2045	industry	1.5 degree	1.86109
Namibia	2045	industry	1.5 degree	4.0954
Nepal	2045	industry	1.5 degree	6.43826
Nicaragua	2045	industry	1.5 degree	0.231233
Niger	2045	industry	1.5 degree	0.577477
Nigeria	2045	industry	1.5 degree	31.6639
Oman	2045	industry	1.5 degree	13.1214
Pakistan	2045	industry	1.5 degree	47.2022
Paraguay	2045	industry	1.5 degree	0.00225305
Peru	2045	industry	1.5 degree	4.31134
Philippines	2045	industry	1.5 degree	54.2604
Qatar	2045	industry	1.5 degree	14.9749
Republic of the Congo	2045	industry	1.5 degree	3.07976
Saudi Arabia	2045	industry	1.5 degree	29.2919
Senegal	2045	industry	1.5 degree	2.05948
South Sudan	2045	industry	1.5 degree	1.36569
Sri Lanka	2045	industry	1.5 degree	2.4536
Sudan	2045	industry	1.5 degree	8.54067
Tajikistan	2045	industry	1.5 degree	3.64138
Turkey	2045	industry	1.5 degree	36.7359
Turkmenistan	2045	industry	1.5 degree	29.8816
Uganda	2045	industry	1.5 degree	2.4357
United Arab Emirates	2045	industry	1.5 degree	33.8543
United Republic of Tanzania	2045	industry	1.5 degree	3.15775
Viet Nam	2045	industry	1.5 degree	76.8317
Zambia	2045	industry	1.5 degree	3.87878
Algeria	2046	industry	1.5 degree	11.9481
Angola	2046	industry	1.5 degree	19.0131
Armenia	2046	industry	1.5 degree	0.171331
Azerbaijan	2046	industry	1.5 degree	1.7004
Bangladesh	2046	industry	1.5 degree	14.9436
Benin	2046	industry	1.5 degree	1.59364
Bolivia (Plurinational State of)	2046	industry	1.5 degree	0.342363
Botswana	2046	industry	1.5 degree	8.85869
Cambodia	2046	industry	1.5 degree	1.03146
Cameroon	2046	industry	1.5 degree	6.23709
Chile	2046	industry	1.5 degree	5.39596
Colombia	2046	industry	1.5 degree	29.3938
Cote d`Ivoire	2046	industry	1.5 degree	2.29868
Democratic Republic of the Congo	2046	industry	1.5 degree	2.2116
Egypt	2046	industry	1.5 degree	17.2976
Eritrea	2046	industry	1.5 degree	0.300829
Ethiopia	2046	industry	1.5 degree	5.94132
Georgia	2046	industry	1.5 degree	0.233316
Ghana	2046	industry	1.5 degree	3.31234
Guatemala	2046	industry	1.5 degree	0.67624
Haiti	2046	industry	1.5 degree	0.299718
Honduras	2046	industry	1.5 degree	0.364659
Indonesia	2046	industry	1.5 degree	164.372
Iraq	2046	industry	1.5 degree	22.7069
Jordan	2046	industry	1.5 degree	3.4814
Kenya	2046	industry	1.5 degree	9.28906
Kyrgyzstan	2046	industry	1.5 degree	0.35461
Lao People`s Democratic Republic	2046	industry	1.5 degree	5.07167
Lebanon	2046	industry	1.5 degree	3.83871
Mali	2046	industry	1.5 degree	1.28763
Mongolia	2046	industry	1.5 degree	0.864018
Morocco	2046	industry	1.5 degree	5.13304
Mozambique	2046	industry	1.5 degree	2.74069
Myanmar	2046	industry	1.5 degree	1.60493
Namibia	2046	industry	1.5 degree	3.95095
Nepal	2046	industry	1.5 degree	5.54231
Nicaragua	2046	industry	1.5 degree	0.196396
Niger	2046	industry	1.5 degree	0.502979
Nigeria	2046	industry	1.5 degree	26.609
Oman	2046	industry	1.5 degree	11.1503
Pakistan	2046	industry	1.5 degree	40.7064
Paraguay	2046	industry	1.5 degree	0.00189956
Peru	2046	industry	1.5 degree	3.76655
Philippines	2046	industry	1.5 degree	47.8637
Qatar	2046	industry	1.5 degree	12.7253
Republic of the Congo	2046	industry	1.5 degree	2.97113
Saudi Arabia	2046	industry	1.5 degree	24.83
Senegal	2046	industry	1.5 degree	1.79379
South Sudan	2046	industry	1.5 degree	1.20227
Sri Lanka	2046	industry	1.5 degree	2.11212
Sudan	2046	industry	1.5 degree	7.5187
Tajikistan	2046	industry	1.5 degree	3.00823
Turkey	2046	industry	1.5 degree	33.4392
Turkmenistan	2046	industry	1.5 degree	24.6859
Uganda	2046	industry	1.5 degree	2.14424
United Arab Emirates	2046	industry	1.5 degree	28.7687
United Republic of Tanzania	2046	industry	1.5 degree	2.80404
Viet Nam	2046	industry	1.5 degree	66.3549
Zambia	2046	industry	1.5 degree	3.41465
Algeria	2047	industry	1.5 degree	9.54933
Angola	2047	industry	1.5 degree	16.9654
Armenia	2047	industry	1.5 degree	0.13819
Azerbaijan	2047	industry	1.5 degree	1.34023
Bangladesh	2047	industry	1.5 degree	12.075
Benin	2047	industry	1.5 degree	1.30402
Bolivia (Plurinational State of)	2047	industry	1.5 degree	0.264571
Botswana	2047	industry	1.5 degree	7.90458
Cambodia	2047	industry	1.5 degree	0.871577
Cameroon	2047	industry	1.5 degree	5.56534
Chile	2047	industry	1.5 degree	4.33031
Colombia	2047	industry	1.5 degree	24.4735
Cote d`Ivoire	2047	industry	1.5 degree	1.88093
Democratic Republic of the Congo	2047	industry	1.5 degree	1.9734
Egypt	2047	industry	1.5 degree	13.8288
Eritrea	2047	industry	1.5 degree	0.248497
Ethiopia	2047	industry	1.5 degree	4.90777
Georgia	2047	industry	1.5 degree	0.186573
Ghana	2047	industry	1.5 degree	2.71037
Guatemala	2047	industry	1.5 degree	0.538913
Haiti	2047	industry	1.5 degree	0.236097
Honduras	2047	industry	1.5 degree	0.290606
Indonesia	2047	industry	1.5 degree	135.059
Iraq	2047	industry	1.5 degree	18.2031
Jordan	2047	industry	1.5 degree	2.79088
Kenya	2047	industry	1.5 degree	7.67807
Kyrgyzstan	2047	industry	1.5 degree	0.284958
Lao People`s Democratic Republic	2047	industry	1.5 degree	4.19584
Lebanon	2047	industry	1.5 degree	3.07732
Mali	2047	industry	1.5 degree	1.05362
Mongolia	2047	industry	1.5 degree	0.732247
Morocco	2047	industry	1.5 degree	4.1025
Mozambique	2047	industry	1.5 degree	2.26392
Myanmar	2047	industry	1.5 degree	1.30653
Namibia	2047	industry	1.5 degree	3.52542
Nepal	2047	industry	1.5 degree	4.4745
Nicaragua	2047	industry	1.5 degree	0.156513
Niger	2047	industry	1.5 degree	0.41157
Nigeria	2047	industry	1.5 degree	20.9974
Oman	2047	industry	1.5 degree	8.93865
Pakistan	2047	industry	1.5 degree	32.9981
Paraguay	2047	industry	1.5 degree	0.00150306
Peru	2047	industry	1.5 degree	3.0851
Philippines	2047	industry	1.5 degree	39.7641
Qatar	2047	industry	1.5 degree	10.2013
Republic of the Congo	2047	industry	1.5 degree	2.65113
Saudi Arabia	2047	industry	1.5 degree	19.8559
Senegal	2047	industry	1.5 degree	1.4678
South Sudan	2047	industry	1.5 degree	0.993126
Sri Lanka	2047	industry	1.5 degree	1.72195
Sudan	2047	industry	1.5 degree	6.21075
Tajikistan	2047	industry	1.5 degree	2.33131
Turkey	2047	industry	1.5 degree	28.4568
Turkmenistan	2047	industry	1.5 degree	19.131
Uganda	2047	industry	1.5 degree	1.77123
United Arab Emirates	2047	industry	1.5 degree	23.0625
United Republic of Tanzania	2047	industry	1.5 degree	2.33516
Viet Nam	2047	industry	1.5 degree	54.0202
Zambia	2047	industry	1.5 degree	2.82064
Algeria	2048	industry	1.5 degree	6.92718
Angola	2048	industry	1.5 degree	13.3207
Armenia	2048	industry	1.5 degree	0.0991902
Azerbaijan	2048	industry	1.5 degree	0.939944
Bangladesh	2048	industry	1.5 degree	8.67936
Benin	2048	industry	1.5 degree	0.954423
Bolivia (Plurinational State of)	2048	industry	1.5 degree	0.181961
Botswana	2048	industry	1.5 degree	6.20643
Cambodia	2048	industry	1.5 degree	0.696178
Cameroon	2048	industry	1.5 degree	4.36973
Chile	2048	industry	1.5 degree	3.09906
Colombia	2048	industry	1.5 degree	18.0871
Cote d`Ivoire	2048	industry	1.5 degree	1.37667
Democratic Republic of the Congo	2048	industry	1.5 degree	1.54945
Egypt	2048	industry	1.5 degree	10.0106
Eritrea	2048	industry	1.5 degree	0.183236
Ethiopia	2048	industry	1.5 degree	3.61888
Georgia	2048	industry	1.5 degree	0.132821
Ghana	2048	industry	1.5 degree	1.98375
Guatemala	2048	industry	1.5 degree	0.382087
Haiti	2048	industry	1.5 degree	0.165411
Honduras	2048	industry	1.5 degree	0.206038
Indonesia	2048	industry	1.5 degree	100.021
Iraq	2048	industry	1.5 degree	13.1585
Jordan	2048	industry	1.5 degree	2.01745
Kenya	2048	industry	1.5 degree	5.65409
Kyrgyzstan	2048	industry	1.5 degree	0.203507
Lao People`s Democratic Republic	2048	industry	1.5 degree	3.13404
Lebanon	2048	industry	1.5 degree	2.22451
Mali	2048	industry	1.5 degree	0.771156
Mongolia	2048	industry	1.5 degree	0.582442
Morocco	2048	industry	1.5 degree	2.976
Mozambique	2048	industry	1.5 degree	1.66936
Myanmar	2048	industry	1.5 degree	0.961328
Namibia	2048	industry	1.5 degree	2.76805
Nepal	2048	industry	1.5 degree	3.21257
Nicaragua	2048	industry	1.5 degree	0.110967
Niger	2048	industry	1.5 degree	0.301232
Nigeria	2048	industry	1.5 degree	14.777
Oman	2048	industry	1.5 degree	6.46151
Pakistan	2048	industry	1.5 degree	23.9236
Paraguay	2048	industry	1.5 degree	0.00105832
Peru	2048	industry	1.5 degree	2.24658
Philippines	2048	industry	1.5 degree	29.6363
Qatar	2048	industry	1.5 degree	7.37426
Republic of the Congo	2048	industry	1.5 degree	2.08158
Saudi Arabia	2048	industry	1.5 degree	14.326
Senegal	2048	industry	1.5 degree	1.0743
South Sudan	2048	industry	1.5 degree	0.732308
Sri Lanka	2048	industry	1.5 degree	1.27755
Sudan	2048	industry	1.5 degree	4.57967
Tajikistan	2048	industry	1.5 degree	1.60714
Turkey	2048	industry	1.5 degree	21.5711
Turkmenistan	2048	industry	1.5 degree	13.1884
Uganda	2048	industry	1.5 degree	1.30606
United Arab Emirates	2048	industry	1.5 degree	16.6713
United Republic of Tanzania	2048	industry	1.5 degree	1.7347
Viet Nam	2048	industry	1.5 degree	39.5549
Zambia	2048	industry	1.5 degree	2.07987
Algeria	2049	industry	1.5 degree	4.06275
Angola	2049	industry	1.5 degree	7.7905
Armenia	2049	industry	1.5 degree	0.0534675
Azerbaijan	2049	industry	1.5 degree	0.495164
Bangladesh	2049	industry	1.5 degree	4.68867
Benin	2049	industry	1.5 degree	0.537694
Bolivia (Plurinational State of)	2049	industry	1.5 degree	0.0939772
Botswana	2049	industry	1.5 degree	3.62978
Cambodia	2049	industry	1.5 degree	0.503946
Cameroon	2049	industry	1.5 degree	2.55561
Chile	2049	industry	1.5 degree	1.66926
Colombia	2049	industry	1.5 degree	10.0142
Cote d`Ivoire	2049	industry	1.5 degree	0.775575
Democratic Republic of the Congo	2049	industry	1.5 degree	0.906187
Egypt	2049	industry	1.5 degree	5.80746
Eritrea	2049	industry	1.5 degree	0.103364
Ethiopia	2049	industry	1.5 degree	2.04142
Georgia	2049	industry	1.5 degree	0.0711722
Ghana	2049	industry	1.5 degree	1.11758
Guatemala	2049	industry	1.5 degree	0.203357
Haiti	2049	industry	1.5 degree	0.0869664
Honduras	2049	industry	1.5 degree	0.109659
Indonesia	2049	industry	1.5 degree	58.2609
Iraq	2049	industry	1.5 degree	7.51678
Jordan	2049	industry	1.5 degree	1.15246
Kenya	2049	industry	1.5 degree	3.16239
Kyrgyzstan	2049	industry	1.5 degree	0.108989
Lao People`s Democratic Republic	2049	industry	1.5 degree	1.8562
Lebanon	2049	industry	1.5 degree	1.27075
Mali	2049	industry	1.5 degree	0.434446
Mongolia	2049	industry	1.5 degree	0.41227
Morocco	2049	industry	1.5 degree	1.74541
Mozambique	2049	industry	1.5 degree	0.941693
Myanmar	2049	industry	1.5 degree	0.564264
Namibia	2049	industry	1.5 degree	1.61887
Nepal	2049	industry	1.5 degree	1.73139
Nicaragua	2049	industry	1.5 degree	0.0590598
Niger	2049	industry	1.5 degree	0.169705
Nigeria	2049	industry	1.5 degree	7.89113
Oman	2049	industry	1.5 degree	3.69112
Pakistan	2049	industry	1.5 degree	13.3099
Paraguay	2049	industry	1.5 degree	0.000559493
Peru	2049	industry	1.5 degree	1.22736
Philippines	2049	industry	1.5 degree	17.0895
Qatar	2049	industry	1.5 degree	4.21253
Republic of the Congo	2049	industry	1.5 degree	1.2174
Saudi Arabia	2049	industry	1.5 degree	8.19295
Senegal	2049	industry	1.5 degree	0.605227
South Sudan	2049	industry	1.5 degree	0.413097
Sri Lanka	2049	industry	1.5 degree	0.772729
Sudan	2049	industry	1.5 degree	2.5834
Tajikistan	2049	industry	1.5 degree	0.831955
Turkey	2049	industry	1.5 degree	12.5363
Turkmenistan	2049	industry	1.5 degree	6.82711
Uganda	2049	industry	1.5 degree	0.736755
United Arab Emirates	2049	industry	1.5 degree	9.52342
United Republic of Tanzania	2049	industry	1.5 degree	0.983894
Viet Nam	2049	industry	1.5 degree	22.6445
Zambia	2049	industry	1.5 degree	1.17326
Algeria	2050	industry	1.5 degree	0.935405
Angola	2050	industry	1.5 degree	0.0339012
Armenia	2050	industry	1.5 degree	3.10334e-05
Azerbaijan	2050	industry	1.5 degree	0.00103772
Bangladesh	2050	industry	1.5 degree	0.0262075
Benin	2050	industry	1.5 degree	0.0457905
Bolivia (Plurinational State of)	2050	industry	1.5 degree	1.33464e-16
Botswana	2050	industry	1.5 degree	0.0157954
Cambodia	2050	industry	1.5 degree	0.293452
Cameroon	2050	industry	1.5 degree	0.011121
Chile	2050	industry	1.5 degree	2.74798e-14
Colombia	2050	industry	1.5 degree	0
Cote d`Ivoire	2050	industry	1.5 degree	0.0660487
Democratic Republic of the Congo	2050	industry	1.5 degree	0.00394337
Egypt	2050	industry	1.5 degree	1.18001
Eritrea	2050	industry	1.5 degree	0.00697939
Ethiopia	2050	industry	1.5 degree	0.137842
Georgia	2050	industry	1.5 degree	0.00062667
Ghana	2050	industry	1.5 degree	0.0951744
Guatemala	2050	industry	1.5 degree	3.98491e-15
Haiti	2050	industry	1.5 degree	3.14935e-15
Honduras	2050	industry	1.5 degree	1.60554e-15
Indonesia	2050	industry	1.5 degree	8.59976
Iraq	2050	industry	1.5 degree	1.21542
Jordan	2050	industry	1.5 degree	0.186347
Kenya	2050	industry	1.5 degree	0.140997
Kyrgyzstan	2050	industry	1.5 degree	4.52553e-10
Lao People`s Democratic Republic	2050	industry	1.5 degree	0.327339
Lebanon	2050	industry	1.5 degree	0.205473
Mali	2050	industry	1.5 degree	0.0369978
Mongolia	2050	industry	1.5 degree	0.219073
Morocco	2050	industry	1.5 degree	0.401861
Mozambique	2050	industry	1.5 degree	0.0635856
Myanmar	2050	industry	1.5 degree	0.109722
Namibia	2050	industry	1.5 degree	0.0070447
Nepal	2050	industry	1.5 degree	0.002544
Nicaragua	2050	industry	1.5 degree	1.61319e-15
Niger	2050	industry	1.5 degree	0.0144523
Nigeria	2050	industry	1.5 degree	0.277303
Oman	2050	industry	1.5 degree	0.596835
Pakistan	2050	industry	1.5 degree	0.962005
Paraguay	2050	industry	1.5 degree	1.10797e-17
Peru	2050	industry	1.5 degree	0
Philippines	2050	industry	1.5 degree	1.65468
Qatar	2050	industry	1.5 degree	0.681144
Republic of the Congo	2050	industry	1.5 degree	0.00529764
Saudi Arabia	2050	industry	1.5 degree	1.40525
Senegal	2050	industry	1.5 degree	0.0515416
South Sudan	2050	industry	1.5 degree	0.0278934
Sri Lanka	2050	industry	1.5 degree	0.200612
Sudan	2050	industry	1.5 degree	0.174438
Tajikistan	2050	industry	1.5 degree	0.00166132
Turkey	2050	industry	1.5 degree	1.07466
Turkmenistan	2050	industry	1.5 degree	0.013633
Uganda	2050	industry	1.5 degree	0.0497476
United Arab Emirates	2050	industry	1.5 degree	1.53989
United Republic of Tanzania	2050	industry	1.5 degree	0.0612745
Viet Nam	2050	industry	1.5 degree	2.92614
Zambia	2050	industry	1.5 degree	0.0792217
Algeria	2020	power	1.5 degree	58.2861
Angola	2020	power	1.5 degree	5.5444
Armenia	2020	power	1.5 degree	3.81125
Azerbaijan	2020	power	1.5 degree	10.3718
Bangladesh	2020	power	1.5 degree	32.9264
Benin	2020	power	1.5 degree	1.73735
Bolivia (Plurinational State of)	2020	power	1.5 degree	4.70135
Botswana	2020	power	1.5 degree	2.58327
Cambodia	2020	power	1.5 degree	0.674972
Cameroon	2020	power	1.5 degree	1.81879
Chile	2020	power	1.5 degree	37.8407
Colombia	2020	power	1.5 degree	21.1647
Cote d`Ivoire	2020	power	1.5 degree	2.50598
Democratic Republic of the Congo	2020	power	1.5 degree	0.644921
Egypt	2020	power	1.5 degree	91.2803
Eritrea	2020	power	1.5 degree	0.0960078
Ethiopia	2020	power	1.5 degree	1.89614
Georgia	2020	power	1.5 degree	1.82304
Ghana	2020	power	1.5 degree	3.61105
Guatemala	2020	power	1.5 degree	5.70937
Haiti	2020	power	1.5 degree	1.51853
Honduras	2020	power	1.5 degree	3.07875
Indonesia	2020	power	1.5 degree	224.383
Iraq	2020	power	1.5 degree	72.8133
Jordan	2020	power	1.5 degree	11.1636
Kenya	2020	power	1.5 degree	1.18832
Kyrgyzstan	2020	power	1.5 degree	7.04035
Lao People`s Democratic Republic	2020	power	1.5 degree	5.29274
Lebanon	2020	power	1.5 degree	12.3094
Mali	2020	power	1.5 degree	1.40375
Mongolia	2020	power	1.5 degree	14.8067
Morocco	2020	power	1.5 degree	25.0404
Mozambique	2020	power	1.5 degree	0.874677
Myanmar	2020	power	1.5 degree	9.6248
Namibia	2020	power	1.5 degree	1.15213
Nepal	2020	power	1.5 degree	0.725714
Nicaragua	2020	power	1.5 degree	1.65814
Niger	2020	power	1.5 degree	0.548339
Nigeria	2020	power	1.5 degree	49.3917
Oman	2020	power	1.5 degree	35.755
Pakistan	2020	power	1.5 degree	88.3216
Paraguay	2020	power	1.5 degree	1.53753
Peru	2020	power	1.5 degree	9.03091
Philippines	2020	power	1.5 degree	67.7329
Qatar	2020	power	1.5 degree	40.8058
Republic of the Congo	2020	power	1.5 degree	0.866406
Saudi Arabia	2020	power	1.5 degree	290.932
Senegal	2020	power	1.5 degree	1.95556
South Sudan	2020	power	1.5 degree	0.383698
Sri Lanka	2020	power	1.5 degree	5.58258
Sudan	2020	power	1.5 degree	2.39955
Tajikistan	2020	power	1.5 degree	1.26156
Turkey	2020	power	1.5 degree	134.722
Turkmenistan	2020	power	1.5 degree	10.3525
Uganda	2020	power	1.5 degree	0.684323
United Arab Emirates	2020	power	1.5 degree	92.2512
United Republic of Tanzania	2020	power	1.5 degree	1.82516
Viet Nam	2020	power	1.5 degree	106.289
Zambia	2020	power	1.5 degree	1.08977
Algeria	2021	power	1.5 degree	52.43
Angola	2021	power	1.5 degree	2.10563
Armenia	2021	power	1.5 degree	1.26507
Azerbaijan	2021	power	1.5 degree	9.54376
Bangladesh	2021	power	1.5 degree	22.3143
Benin	2021	power	1.5 degree	1.73972
Bolivia (Plurinational State of)	2021	power	1.5 degree	3.29451
Botswana	2021	power	1.5 degree	2.58296
Cambodia	2021	power	1.5 degree	0.277987
Cameroon	2021	power	1.5 degree	0.87608
Chile	2021	power	1.5 degree	19.3568
Colombia	2021	power	1.5 degree	7.0933
Cote d`Ivoire	2021	power	1.5 degree	2.11727
Democratic Republic of the Congo	2021	power	1.5 degree	0.000446304
Egypt	2021	power	1.5 degree	77.3271
Eritrea	2021	power	1.5 degree	0.0882857
Ethiopia	2021	power	1.5 degree	0.000527443
Georgia	2021	power	1.5 degree	0.371046
Ghana	2021	power	1.5 degree	2.6543
Guatemala	2021	power	1.5 degree	2.13814
Haiti	2021	power	1.5 degree	1.13014
Honduras	2021	power	1.5 degree	1.3254
Indonesia	2021	power	1.5 degree	190.381
Iraq	2021	power	1.5 degree	69.7577
Jordan	2021	power	1.5 degree	9.37318
Kenya	2021	power	1.5 degree	0.161893
Kyrgyzstan	2021	power	1.5 degree	0.51435
Lao People`s Democratic Republic	2021	power	1.5 degree	1.86057
Lebanon	2021	power	1.5 degree	11.4818
Mali	2021	power	1.5 degree	1.09352
Mongolia	2021	power	1.5 degree	14.6809
Morocco	2021	power	1.5 degree	19.8735
Mozambique	2021	power	1.5 degree	0.189635
Myanmar	2021	power	1.5 degree	6.12545
Namibia	2021	power	1.5 degree	0.0729557
Nepal	2021	power	1.5 degree	0
Nicaragua	2021	power	1.5 degree	0.650008
Niger	2021	power	1.5 degree	0.549087
Nigeria	2021	power	1.5 degree	51.0859
Oman	2021	power	1.5 degree	34.4046
Pakistan	2021	power	1.5 degree	54.1544
Paraguay	2021	power	1.5 degree	5.89329e-05
Peru	2021	power	1.5 degree	3.68756
Philippines	2021	power	1.5 degree	56.1159
Qatar	2021	power	1.5 degree	39.2646
Republic of the Congo	2021	power	1.5 degree	0.827963
Saudi Arabia	2021	power	1.5 degree	274.332
Senegal	2021	power	1.5 degree	1.95823
South Sudan	2021	power	1.5 degree	0.352837
Sri Lanka	2021	power	1.5 degree	5.09757
Sudan	2021	power	1.5 degree	1.01636
Tajikistan	2021	power	1.5 degree	0.0897797
Turkey	2021	power	1.5 degree	94.0364
Turkmenistan	2021	power	1.5 degree	9.6596
Uganda	2021	power	1.5 degree	0.0107044
United Arab Emirates	2021	power	1.5 degree	87.9059
United Republic of Tanzania	2021	power	1.5 degree	1.43255
Viet Nam	2021	power	1.5 degree	74.0921
Zambia	2021	power	1.5 degree	0.176627
Algeria	2022	power	1.5 degree	50.8304
Angola	2022	power	1.5 degree	2.5676
Armenia	2022	power	1.5 degree	1.01804
Azerbaijan	2022	power	1.5 degree	9.45684
Bangladesh	2022	power	1.5 degree	20.2742
Benin	2022	power	1.5 degree	2.15904
Bolivia (Plurinational State of)	2022	power	1.5 degree	3.76749
Botswana	2022	power	1.5 degree	3.22372
Cambodia	2022	power	1.5 degree	0.20849
Cameroon	2022	power	1.5 degree	1.06829
Chile	2022	power	1.5 degree	18.5
Colombia	2022	power	1.5 degree	7.85634
Cote d`Ivoire	2022	power	1.5 degree	2.57159
Democratic Republic of the Congo	2022	power	1.5 degree	0.000544222
Egypt	2022	power	1.5 degree	81.5025
Eritrea	2022	power	1.5 degree	0.0915369
Ethiopia	2022	power	1.5 degree	0.000553229
Georgia	2022	power	1.5 degree	0.305434
Ghana	2022	power	1.5 degree	3.22385
Guatemala	2022	power	1.5 degree	1.92238
Haiti	2022	power	1.5 degree	1.03148
Honduras	2022	power	1.5 degree	1.19165
Indonesia	2022	power	1.5 degree	193.847
Iraq	2022	power	1.5 degree	68.393
Jordan	2022	power	1.5 degree	9.20771
Kenya	2022	power	1.5 degree	0.190002
Kyrgyzstan	2022	power	1.5 degree	0.443673
Lao People`s Democratic Republic	2022	power	1.5 degree	1.78821
Lebanon	2022	power	1.5 degree	11.2791
Mali	2022	power	1.5 degree	1.32816
Mongolia	2022	power	1.5 degree	15.9449
Morocco	2022	power	1.5 degree	19.4766
Mozambique	2022	power	1.5 degree	0.198905
Myanmar	2022	power	1.5 degree	6.81751
Namibia	2022	power	1.5 degree	0.0889619
Nepal	2022	power	1.5 degree	0
Nicaragua	2022	power	1.5 degree	0.584414
Niger	2022	power	1.5 degree	0.681431
Nigeria	2022	power	1.5 degree	67.7561
Oman	2022	power	1.5 degree	33.6858
Pakistan	2022	power	1.5 degree	47.2146
Paraguay	2022	power	1.5 degree	5.56775e-05
Peru	2022	power	1.5 degree	3.79132
Philippines	2022	power	1.5 degree	58.5633
Qatar	2022	power	1.5 degree	38.4442
Republic of the Congo	2022	power	1.5 degree	1.02974
Saudi Arabia	2022	power	1.5 degree	265.754
Senegal	2022	power	1.5 degree	2.43022
South Sudan	2022	power	1.5 degree	0.36583
Sri Lanka	2022	power	1.5 degree	6.53018
Sudan	2022	power	1.5 degree	1.06605
Tajikistan	2022	power	1.5 degree	0.0876132
[truncated: 27,265 more rows]
