# Supplementary material for: Global mitigation efforts cannot neglect emerging emitters
Source: Research Square preprint supplement (doi:10.21203/rs.3.rs-376475/v2), 2022-04-18
Supplement: Supplementary file 2 [file faf1e8200868088a4bef75b6.xlsx]

## Sheet: 59EmergingEmitters
Country	Stage	Country	Stage
Lao People's Dem. Rep.	LDC, LLDC, DE	Kenya	DE
Myanmar	LDC, DE	Uganda	LDC, LLDC, DE
Zambia	LDC, LLDC, DE	Qatar	DE
Mozambique	LDC, DE	Pakistan	DE
Tajikistan	LLDC, EIT	Turkey	DE
Nepal	LDC, LLDC, DE	Indonesia	DE
Botswana	LLDC, DE	Mongolia	LLDC
Cambodia	LDC	Algeria	DE
Ethiopia	LDC, LLDC, DE	Jordan	DE
Sri Lanka	DE	Iraq	DE
Georgia	EIT	Ghana	DE
Cote d'Ivoire	DE	Eritrea	LDC, DE
Tanzania	LDC, DE	Azerbaijan	LLDC, EIT
Philippines	DE	Namibia	DE
Dem. Rep. Congo	LDC, DE	Armenia	LLDC, EIT
Mali	LDC, LLDC, DE	Colombia	DE
Haiti	LDC, DE	Sudan	LDC, DE
Bolivia	LLDC, DE	United Arab Emirates	DE
Paraguay	LLDC, DE	Saudi Arabia	DE
Nigeria	DE	Chile	DE
Rep. Congo	DE	Honduras	DE
Niger	LDC, LLDC, DE	Morocco	DE
Bangladesh	LDC, DE	Cameroon	DE
Kyrgyzstan	LLDC, EIT	Angola	LDC, DE
Oman	DE	Turkmenistan	LLDC, EIT
Guatemala	DE	Nicaragua	DE
Viet Nam	DE	Peru	DE
Senegal	LDC, DE	South Sudan	LDC, LLDC,
Benin	LDC, DE	Egypt	DE
Lebanon	DE
Note: The 59 countries with fast-growing CO2 emissions are listed above. The developing stages of the countries vary from least developed countries (LDC), developing economies (DE), and economies in transition (EIT).
